# Maize leaf functional responses to drought episode and rewatering

He Song<sup>1,2</sup>, Yibo Li<sup>1,2</sup>, Li Zhou<sup>3</sup>, Zhenzhu Xu<sup>1</sup>, Guangsheng Zhou<sup>1,3</sup>

<sup>1</sup>State Key Laboratory of Vegetation and Environmental Change, Institute of Botany, Chinese Academy of Sciences, Beijing 100093, China; <sup>2</sup>Graduate School of Chinese Academy of Sciences, Beijing 100049, China; <sup>3</sup>Chinese Academy of Meteorological Sciences, China Meteorological Administration, Beijing 100081, China

\*Corresponding authors: xuzz@ibcas.ac.cn, gszhou@ibcas.ac.cn

## Abstract

Effects of crop growth and physiological activity to drought and irrigation regimes have been extensively studied; however, the responses of plant growth, morphological and photosynthetic behaviors to drought episodes and thereafter rewatering receive a less attention. This field experiment was carried out directly *in situ* at an agricultural ecosystem research station during 2015-2016, in a northeastern China, on the renowned northeastern maize production belt, where is being threatened by severe drought. A field automatic rain-shelter was used, and five irrigation regimes including control, four drought episodes, and rewatering treatments were established. The chlorophyll contents (SPAD values), light-saturated photosynthetic rate ( $A_{\text{sat}}$ ), and photosystem II actual quantum yield ( $\Phi_{\text{PSII}}$ ), maximum quantum yield ( $F_v'/F_m'$ ) decreased at lower leaf positions and with plant development. Episodic drought effects on plant growth, leaf morphological traits and photosynthetic processes at both vegetative and reproductive stages were severely remarked, particularly at late development stage and with longer drought duration. The recovery of leaf functional traits of the plants experienced historical-drought following re-irrigating was not fully restored to the level of the plants subjected to ample and normal water status; and the strength of recovery was proportional to the persistence of pre-drought episodes. The relationship of  $A_{\text{sat}}$  with SPAD depends on water status and plant development. A principal component analysis can well denote the change patterns in responses to water status treatments with plant development. The results may give an insight into

31 how to understand the maize traits' responses to drought episode and rewatering, and  
32 this also might assist the drought-stricken crops to cope with future climatic change.

33 **Kew Words:** Climate Change; Drought Episode; Irrigation Regimes; Leaf Age;  
34 Photosynthetic Potentials; *Zea Mays* L.

35

## 36 **1. Introduction**

37 Climate change results in abnormal changes in precipitation patterns in terms of both  
38 its total amounts and episodic drought frequencies (Alley *et al.* 2003; Trenberth *et al.*  
39 2014; IPCC 2014). Water shortage is a crucial constraint to crop growth, yield,  
40 physiological processes in many areas around world, including rain-fed and  
41 deficit-irrigation regions; meanwhile the abnormal occurrences of drought episodes  
42 usually fluctuates at various spatial-temporal scales (Boyer 1982; Battisti & Naylor  
43 2009; IPCC 2014; Rurinda *et al.* 2014; Myers *et al.* 2017). Intensifying drought also  
44 may eliminate the expected benefits from some fewer favorite factors due to climate  
45 change such as elevated CO<sub>2</sub> and enhanced anthropogenic nitrogen (N) deposit  
46 (Iversen & Norby 2014; Gray *et al.* 2016; Xu *et al.* 2016), and climatic warming may  
47 exacerbate drought disaster by further reducing soil moisture availability (Zeng *et al.*  
48 2005; Lobell *et al.* 2011, 2014; Iversen & Norby 2014). As reported, due to  
49 potentially adverse climate change, since 1950s to the present, agricultural  
50 drought-inducible disaster area also had an increasing trend in China—the  
51 drought-induced grain loss reached approximate 25-30 billion kg, accounting for 60%  
52 of total loss of natural disaster (Jiao *et al.* 2014, Zhou 2015). It has been notable that  
53 China's agricultural drought becomes more serious mainly due to the adverse climate  
54 change and rapid social-economic development.

55 Maize is one of the most important three staple crops—maize, wheat, and rice, and  
56 the main resources of the feed, industrial raw materials (Campos *et al.* 2004; Long *et al.*  
57 2006; Ribaut *et al.* 2009), recent years it ranked first place among the three staple  
58 crops (FAO 2017). In China, it also plays a critical role in food security and  
59 husbandry industry development among agricultural and even entire economic sectors

at both regional and national levels (Meng *et al.* 2013; Ma & Ma 2017; PINC 2017). Drought is one of major limitations to maize production (Boyer 1982; Sharp *et al.* 2004; Xu *et al.* 2008; Lobell *et al.* 2014; Avramova *et al.* 2015), resulting in a yield reduction of 25-30% , even with no harvest in those years of extremely severe drought (Campos *et al.* 2004; Zhang *et al.* 2011). In USA major maize production zone, the drought sensitivity in maize production in recent two decades has been also reported to increase, despite cultivar improvements and the agronomic practices with higher sowing densities (Lobell *et al.* 2014). Climatic warming is projected to further exaggerate drought's negative impact, leading to huge loss of maize production (Ribaut *et al.* 2009; Lobell *et al.* 2014). Drought stress leads to reductions in maize (*Zea mays* L.) and other crops' yields mainly by (i) reducing plant growth and reproductive activities, (ii) reducing photosynthetic potentials and thereby radiation use efficiency (RUE), and (iii) reducing harvest index (HI) (Saini & Westgate 1999; Earl & Davis 2003; Barnabás *et al.* 2008; Xu *et al.* 2008). Contrastingly, if a maize cultivar root system and its ear growth are not completely limited, and leaf survival is enhanced despite water deficit, the cultivar may be recognized as high drought-tolerant one (Ribaut *et al.* 2009). Nevertheless, the intermittent drought imposition, and then following rewatering effects on crop plants grown in field still receive a relatively scant attention.

Based on cyclic drought experiment using *Catalpa bungei* species, the accumulative functional effects of progressive drought and subsequent re-watering on plant growth, leaf and root parameters has been found as a useful adaptive mechanism to drought successive drought and subsequent rewatering (Zheng *et al.* 2017). As recently reported by Abid *et al.* (2016), the adaptability to drought, and recovery rate and capacity was closely associated with wheat cultivars. The accumulation of effective metabolites such as sugars, and some amino acids like proline and leucine may exert an adaptive mechanism in response to the drought cyclic patterns (Meyer *et al.* 2014; Foster *et al.* 2015; Sun *et al.* 2016; Zheng *et al.* 2017). In plants of *Lupinus albus*, the new leaves can be produced more as quickly re-watered, although

restoration of other metabolites (e.g. sugar content) was lagged (Pinheiro *et al.* 2004). Maize leaf length undergone one or several days of drought can restore completely following rewatering, but its growth rate could not reach the control level, suggesting that the growth resumption may be only a postponed event, no overcompensation occurrence (Acevedo *et al.* 1971). It is implied that the magnitude and rate of resumption might depend on pre-drought intensity and its duration (Hsiao 1973; Xu & Zhou 2007; Xu *et al.* 2009, 2010). Thus, the extent of compensation for the limitation of pre-drought by promoting plant growth as rewatering might determine the final plant biomass or crop yield, which may link to drought severity and its duration. Nevertheless, whether plant growth and physiological activities completely recovery following rewatering, what are the rate and degree of recovery, and the ability of the adaption to the drying-rewetting cycles might strongly depend on previous drought strength and persistent duration, species and genetic types, and drying-rewetting cycle patterns, which the underlying mechanism is elusive so far (Loewenstein & Pallardy 2002; Marron *et al.* 2003; Flexas *et al.* 2004; Yahdjian & Sala 2006; Xu *et al.* 2009, 2010; Sun *et al.* 2016; Zheng *et al.* 2017). Thus, responses of plant growth and leaf functional processes to drought history and subsequent rewatering remain to be clarified further, particularly *in situ* crop field.

As stated above, drought effects on plant/crop growth, photosynthesis, and other crucial eco-physiological process have been investigated extensively (e.g., Ne Smith & Ritchie 1992; Yordanov *et al.* 2002; Chaves *et al.* 2002; Harrison *et al.* 2014). However, as just recently stated by Abid *et al.* (2016), “studying plants’ capability to adapt and recover from drought stress is essential because of the ever-changing nature of drought events”. Herein, the objectives of this present study were to: (1) examine the effects of drought episode and rewatering on photosynthetic capacity and chlorophyll fluorescence; (2) compare the leaf functional responses to drought episode and rewatering at different leaf positions from bottom-most to upmost leaves, at various plant growth developments; (3) determine changing patterns in responses to drought episode and recovery after re-watering on photosynthetic capacity and chlorophyll fluorescence with the leaf developments; and (4) elucidate the index for

drought adaptability and recovery ability following a pre-drought episode. Our hypotheses are expected: i) drought-episode-induced negative responses may depend on leaf ages/positions and leaf/plant development; ii) the amelioration of drought-induced negative responses by rewatering in field grown maize plants may mainly result from gas exchange behaviors relative to the chlorophyll fluorescence performances—photosystem II (PSII) photochemical processes; iii) the morphological and physiological functional traits may closely interacted, coordinately representing the adaptive responses to episodic drought and following re-wetting.

127

## 128 **2. Materials and Methods**

### 129 **2.1. Site descriptions**

The present two-year field experiment was carried out directly *in situ* at an agricultural ecosystem research station during 2015-2016 (41°49'N, 121°12'E, 27.4 m a.s.l.), Jinzhou Ecology and Agricultural Meteorology Center, Jinzhou, Liaoning, a northeastern Chinese province on the renowned northeastern maize production belt (PINC 2017). This region is located in the northeast of the Eurasian areas, belongs to the warm temperate semi-humid monsoon climate, and atmospheric circulation mainly composed of westerlies and subtropical systems, with clear four seasons. The mean annual temperature is 7.8-9.0 °C, with the extreme maximum temperature of 41.8 °C and the extreme minimum temperature of -31.3 °C; annual frost-free period is 144-180 days; average annual rainfall is 540-640 mm, with 60% - 70% of rainfall concentrated in the summer. The soil is the typical brown soil, with a soil pH value of 6.3. The organic matter and total nitrogen content is 6.41-9.43 g kg<sup>-1</sup> and 0.69 g kg<sup>-1</sup>, respectively. The staple crop in the region is maize (Han *et al.* 2007).

143

### 144 **2.2. Experimental design**

This study, a maize water-controlled field experiment, was conducted using a huge mobile rain-proof shelter during two growth seasons of 2015-2016. The two-year experimental design and its results were similar; thus, here the 2016-year results were

mainly reported (for 2015-year experimental design and its results, see the Supporting Information File: Table S1 & S2, and Figures S1-S3). In the 2016-year experiment, the five irrigation treatments were designed: T<sub>1</sub>, T<sub>2</sub>, T<sub>3</sub>, T<sub>4</sub>, and T<sub>5</sub> treatments, which denote Control, withholding water during jointing-tasseling, jointing-anthesis, tasseling-milking, and silking-milking, with 260, 188, 138, 136, and 161 mm irrigation amount in entire developmental stage, respectively (**Table 1**).

There were three replicates in each treatment and 15 plots in total. Each plot is 5 m long and 3 m wide, surrounded by cement layer to avoid water permeation. The large mobile water-proof shelter is 4 m high, which is used for simulated precipitation to avoid the rainfall entrance. Maize cultivar used in this experiment was Danyu 405, which has been planted widely in this region. Seeds were sowed on 23 May, 2016. Controlled release fertilizer was used with 600 kg km<sup>-2</sup>.

160

### 2.3. Environmental variables and maize traits measurements

**Soil relative water content (SRWC) measurements** We used weighing method to measure the soil relative water content. Methods with soil auger were used to retrieve soil samples (0-50 cm), then put the samples to the aluminum specimen box, and weighed the samples to obtain the wet weight. Later, the samples were dried in an oven at 105 °C until a constant weight, and then the dried soil sample was weighed. There were three replicates in each treatment. The SRWC was calculated by the equation below:

169

$$\text{SRWC} = (\text{Wet soil weight} - \text{Dry soil weight}) / \text{Dry soil weight} / \text{F.C.} \times 100\%$$

where F.C. is the soil water content measured 24 h after amply wetting the soil.

172

**Chlorophyll content measurements** The relative chlorophyll contents (i.e., SPAD values) of maize leaves were measured by a SPAD-502 meter (Minolta Camera Co. Ltd., Japan). We chose 3-5 plants grown healthily for each treatment, and each leaf was measured three times on the leaf middle area to avoid the main vein, and then averaged.

**Photosynthetic and chlorophyll fluorescence parameters** When measured the photosynthetic parameters, three-five plants grown healthily were chosen for each treatment, with a CIRAS-2 gas exchange system (PP Systems, Hertfordshire, UK). We measured the upper (i.e., the youngest and expanded leaves, 1–2 leaves from the top of the plants), middle (ear leaf or the leaves above or below ear leaf) and lower positions (relative orderly leaves) of each plant, respectively. Instrumentation system provided the red and blue built-in light source, and light intensity (Photosynthetically active radiation, PAR) was set to 1500  $\mu\text{mol m}^{-2}\text{s}^{-1}$ . To ensure ample temperature and humidity conditions, the photosynthetic parameters of the maize leaves were measured at 9:00-11:00. The whole measuring process was used an open gas path, air relative humidity was controlled in 50% - 70%,  $\text{CO}_2$  concentration was controlled in 380 – 390  $\mu\text{mol mol}^{-1}$ , and leaf temperature was set up at around 27 °C. The parameters included light-saturated net photosynthetic rate ( $A_{\text{sat}}$ ), transpiration rate ( $E$ ), stomatal conductance ( $g_s$ ); and the leaf water use efficiency (WUE) was calculated by the formula:  $\text{WUE} = A_{\text{sat}} / E$ .

The chlorophyll fluorescence parameters were measured using a chlorophyll fluorescence module (CFM) integrated with the CIRAS-2 gas exchange system at the same part of the same leaves measured simultaneously for the gas exchange parameters. First, the leaves were lighted at a light intensity of 1500  $\mu\text{mol m}^{-2}\text{s}^{-1}$  after 15 min to measure the steady-state fluorescence ( $F_s$ ), and then gave a strong flash (5100  $\mu\text{mol m}^{-2}\text{s}^{-1}$ , with pulse time of 0.3 s) to measure the maximum fluorescence ( $F_m'$ ); later put the leaves under dark adaptation for 3 s, opened the far red after 5 s to measure the minimum light fluorescence ( $F_o'$ ). According to the expressions, we calculated chlorophyll fluorescence parameters: maximum quantum yield of PSII photochemistry ( $F_v'/F_m'$ ), quantum yield of PSII electron transport ( $\Phi_{\text{PSII}}$ ), photochemical quenching ( $q_P$ ), and non-photochemical quenching (NPQ) (Genty *et al.* 1989; van Kooten & Snel 1990; Maxwell & Johnson 2000; Kramer *et al.* 2004):

$$F_v'/F_m' = (F_m' - F_o')/F_m'$$

$$\Phi_{\text{PSII}} = (F_m' - F_s)/F_m'$$

$$q_p = (F_m' - F_s) / (F_m' - F_o')$$

$$NPQ = (F_m - F_m') / F_m'$$

**Plant height and leaf area measurements** Plant height and leaf area of maize were measured at different stages, and the measured dates were approximately consistent with those for the measurements of photosynthetic and fluorescence parameters. Maximum length and width were measured for each leaf of a maize plant. A conventional formula of the total leaf area per plant was used (Francis *et al.* 1969):

$$\text{Total leaf area of an entire plant} = \sum_{i=1}^n (Li \times Wi \times 0.75)$$

where  $i$  is the leaf order number of the measured plant,  $n$  is total number of the plant,  $Li$  is leaf maximum, and  $Wi$  leaf maximum width.

#### **Leaf rolling index, leaf erection index, and leaf drooping angle determinations**

The upper leaf actual width (at natural state,  $L_n$ ), maximum width (at unfolding state,  $L_w$ ), natural length ( $L_{nl}$ ), maximum length ( $L_{sl}$ ), basic angle of leaf (the angle between leaf and stem), drooping angle (under the naturally bending down of the leaf, the angle between the line from the pulvinus to the tip and the stem) were determined. Then, the leaf rolling index (LRI, %), leaf erection index (LEI, %), leaf bend degree (LBD, °) were calculated based on Xiang *et al.* (2012):

$$LRI = (L_w - L_n) / L_w \times 100$$

$$LEI = L_{nl} / L_{sl} \times 100$$

$$LBD = \text{Drooping angle} - \text{Basic angle}.$$

**The plant biomass and grain yield** At the end of grain-filling, the tagged plants for measurements of these traits were retrieved, dried at 80°C to constant weight in a drying oven, and weighed to obtain the plant root, stem, leaf, and grain biomass.

#### **2.4. Data statistics**

The statistical analysis was used with SPSS 20.0 software (SPSS Inc., Chicago, IL). One-way ANOVA with Duncan's multiple comparison was used to test the differences in the plant and leaf functional traits and morphological indicators between watering



235 treatments at a 0.05 significance level. The differences of functional parameters  
236 among watering treatments, leaf positions and measurement dates were tested by the  
237 three-way ANOVA at the 0.05 significance level. The correlations between leaf  
238 functional and morphological traits were analyzed with Pearson method. The  
239 comprehensive patterns of the responses of leaf functional and morphological traits to  
240 episodic drought and rewatering were further analyzed with principal component  
241 analysis (PCA, Jolliffe 2002).

242

### 243 **3. Results**

#### 244 **3. 1. Photosynthetically physiological responses to drought episode and** 245 **rewatering**

##### 246 ***3.1.1 Responses in upper leaves***

247 Photosynthetic physiological parameters were measured during the entire growing  
248 season: on 1, July (V13, jointing); 14, July (V21); 25, July (VT, tasselling); 31, July  
249 (R1, Silking); 7, August (R2, blistering); 14, August (R3, milking); 29, August (R4,  
250 dough), respectively (Table 1). As shown in Figure 1, the upper leaf net light-saturated  
251 photosynthetic rate ( $A_{\text{sat}}$ ) of control treatment ( $T_1$ ) increased with earlier plant  
252 development, reaching the maximum of  $45.4 \mu\text{mol m}^{-2}\text{s}^{-1}$  on 31 July (R1 stage),  
253 thereafter sharply decreasing until to a lowest point of  $14.1 \mu\text{mol m}^{-2}\text{s}^{-1}$  by 68.5% at  
254 later grain-filling stage.

255 For the  $T_2$  treatment (withholding water during jointing – tasseling, 27 days), the  
256 episodic drought led to a significant decline of  $A_{\text{sat}}$  with a low level of  $21.7 \mu\text{mol}$   
257  $\text{m}^{-2}\text{s}^{-1}$  on 14, July (V21 stage), a 40.3% drop; and further down to a lower level of  
258  $15.6 \mu\text{mol m}^{-2}\text{s}^{-1}$  on 25, July (VT stage), a 65.6% drop. Upon re-irrigating, it rose up  
259 to  $24.4 \mu\text{mol m}^{-2}\text{s}^{-1}$  by 56.4% relative to the previous value , but not to reach the level  
260 of control treatment at the same stage—a maximum of  $45.4 \mu\text{mol m}^{-2}\text{s}^{-1}$  for the control  
261 plant. It indicated that a 27-day episodic drought from jointing to tasseling  
262 significantly inhibited photosynthetic capacity, just a part of recovery when following  
263 rewatering occurred, resulting in limitation to plant growth and development, and

264 final grain yield loss.

265 Leaf  $A_{\text{sat}}$  of the  $T_3$  treatment (withholding water during jointing –anthesis, 41 days)  
266 always markedly decreased, even it remained a low and stable level as rewatering and  
267 during anthesis, thereafter declined rapidly after milking until to a low level of 6.6  
268  $\mu\text{mol m}^{-2}\text{s}^{-1}$  at later grain-filling. The rewatering had a relatively-higher stimulation  
269 relative to the control only at milking, indicating the mild stimulation appeared (17.0  
270 vs: 15.4  $\mu\text{mol m}^{-2}\text{s}^{-1}$ , Figure 1a).

271 While leaf  $A_{\text{sat}}$  of the  $T_4$  treatment (withholding water during tasseling–milking, 41  
272 days) had an increase at earlier withholding water (silking stage), then sharply  
273 declined to a low level of 12.0  $\mu\text{mol m}^{-2}\text{s}^{-1}$  at blistering, thereafter remaining a lower  
274 and stable level until the end of the grain-filling, although this time it seemed to  
275 lightly rise relative to  $T_3$  treatment, indicating that a stimulation occurred by the just  
276 nearly rewatering. Leaf  $A_{\text{sat}}$  of the  $T_5$  treatment (withholding water during  
277 silking–milking, 34 days), similar to  $T_4$  but less 7-day drought duration, declined even  
278 more sharply. It may indicate that later drought at tasseling may result in more  
279 sensitive effect on the gas exchange processes.

280 Other photosynthetically physiological parameters in the upper leaves showed  
281 similar change patterns (Figure 1b-f): For  $T_2$  and  $T_3$  plants, SPAD,  $g_s$ , and  $E$  markedly  
282 decreased 4 weeks after withholding water. However,  $\Phi_{\text{PSII}}$  and  $F_v'/F_m'$  remained stable.  
283 Rewatering for  $T_2$  on 27, July, and for  $T_3$  on 10, August, resulted in stimulations in  
284 SPAD,  $g_s$ ,  $E$ ,  $\Phi_{\text{PSII}}$ , and  $F_v'/F_m'$ ; However, they still could not fully recover to the  
285 normal level. The drought stresses of  $T_4$  and  $T_5$  treatments also led to declines in the  
286 gas exchange rates, while the chlorophyll fluorescence parameters remained relatively  
287 stable except  $T_4$  treatment decrease during drought episode and thereafter rewatering.

### 288 **3.1.2 Responses in middle leaves**

289 The changes in photosynthetic capacity of leaves at the plant middle position  
290 exhibited a similar change pattern in the upper leaves (**Figure 2**): As compared to the  
291 upper leaves, however, there were lower levels of  $A_{\text{sat}}$ , SPAD,  $g_s$ , and  $E$  during  
292 drought episodes, while rewatering following the pre-drying also did not lead to a  
293 complete restoration in the gas exchange parameters and SPAD values at later

294 grain-filling stage. The chlorophyll fluorescence parameters still maintained a high  
295 level, implying that relatively mature middle leaves may have a drought-resistance in  
296 terms of PSII photochemical activities as compared with the younger upper leaves.

### 297 **3.1.3 Responses in bottom leaves**

298 As measured in bottom leaves, there were greater levels in  $A_{\text{sat}}$  and SPAD under  
299 various water treatments at jointing stage (1, July), declining with plant developing  
300 (Figure 3). Plants at normal irrigation (control treatment) showed higher levels in the  
301 gas exchange parameters ( $A_{\text{sat}}$ ,  $g_s$ , and  $E$ ) and SPAD values, while lower levels were  
302 found during drought episodes, i.e., under  $T_3$ ,  $T_4$ , and  $T_5$  treatments. Only part  
303 recovery was obtained upon rewatering at end of grain-filling stage in the plants  
304 experienced pre-drying history ( $T_4$  and  $T_5$  treatments). The chlorophyll fluorescence  
305 parameters such as  $\Phi_{\text{PSI}}$  and  $F_v'/F_m'$  were maintained at a higher level as the plants  
306 were subjected to withholding water treatments, particularly under  $T_3$  treatment  
307 (41-day withholding water during Jointing – anthesis). This again implicates an  
308 adaptive response to drought episode in terms of chlorophyll PSII photochemical  
309 activities.

310 The three-way ANOVA showed that watering treatment, leaf position, and  
311 measured date produced significant effects on SPAD,  $A_{\text{sat}}$ ,  $E$  and WUE, individually  
312 ( $P < 0.001$ ; Table 2). Only date alone and the interaction between leaf position and  
313 date had significant effects on  $g_s$  ( $P < 0.05$ ). The interactions between watering and  
314 date, and between leaf position and date significantly affected SPAD,  $A_{\text{sat}}$ , and  $E$  ( $P <$   
315  $0.001$ ). Effect of leaf position and date alone, and their interaction on  $\Phi_{\text{PSII}}$  were  
316 significant; while the significant effect on  $F_v'/F_m'$  from date as single factor, and its  
317 interaction with leaf position appeared. The interaction of the three factors was not  
318 observed ( $P > 0.05$ ).

319 The 2015-year experiment obtained the similar results on the responses of the  
320 relative chlorophyll content (SPAD values) and photosynthetic potentials mainly  
321 indicated by fluorescence parameters to the drought episode and the following  
322 rewatering regimes at the same experimental site (see Figures S1-S3).

323

### 324 **3.2. Photosynthetically physiological responses in the leaves tagged at different** 325 **developments.**

326 We measured the same leaves tagged to examine the photosynthetically physiological  
327 processes at different plant developments/leaf ages and the responses to episodic  
328 drought and rewatering—just starting from emerging of the leaves to becoming fully  
329 senesced. As showed in Figure 4, the leaf  $A_{\text{sat}}$  increased from the initial stage on first  
330 July, reaching a maximum on 25 July; thereafter, linearly declining with plant  
331 developing or leaf aging (Figure 4a). A gradual increase in SPAD values was observed  
332 initially with a maximum occurrence on 31 July, and a marked decline at end of  
333 grain-filling, i.e., 29 August (Figure 4b). Acute declines in  $E$  and  $g_s$  were obtained  
334 after 31 July (Figure 4c,d); whereas the two chlorophyll fluorescence parameters  
335 ( $\Phi_{\text{PSII}}$  and  $F_v'/F_m'$ ) did not fluctuate greatly (Figure 4e,f).

336 As compared to the normal water supply, drought episodes of  $T_3$ ,  $T_4$ , and  $T_5$   
337 treatments resulted in the declines in the tagged leaves' gas exchange  
338 parameters— $A_{\text{sat}}$ ,  $g_s$ , and  $E$ , particularly with a longer drought persistence; while parts  
339 of stimulations by rewatering occurred after an episodic drought (Figure 4a,c,d).  
340 Decreases in SPAD values were often found as the drying episode occurred,  
341 particularly at the end of grain-filling (Figure 4b). We found that the two chlorophyll  
342 fluorescence parameters ( $\Phi_{\text{PSII}}$  and  $F_v'/F_m'$ ) had a slight response to either drought  
343 episodes or following rewatering, even with relative high levels upon the following  
344 rewatering (Figure 4e,f). This indicated that, in terms of chlorophyll fluorescence  
345 parameters, drought-tolerance may be enhanced with the leaf developing or its aging,  
346 this issue may need to be investigated further for different crops and their cultivars.

347

### 348 **3.3. Responses of leaf morphological traits to drought and its relieving.**

349 Changes in maize plant canopy features (plant height, leaf area), leaf morphologic  
350 traits (leaf size, leaf rolling index (LRI), leaf erection index (LEI), leaf bend degree  
351 (LBD)) in responses to drought episodes and rewatering were shown in Table 3. The  
352 results at first measurement (1 July 2016) showed that no significant changes in plant  
353 height, plant individual leaf area, LRI, LEI, and LBD when the plants subjected to the

normally watering treatments. LRIs of T<sub>2</sub> and T<sub>3</sub> on 14 July increased significantly due to their undergoing a 15-day drought episode duration. Plants of T<sub>2</sub> and T<sub>3</sub> reduced plant height and total leaf area, but increased LRI significantly on 25 July, indicating that the two drought treatments significantly affected plant and leaf growth, and morphological traits and canopy structure. LRI of T<sub>3</sub> was greatest under drought on 31 July; and that of T<sub>2</sub> just following rewatering rapidly decreased relative to the previous measurement; and the treatments of T<sub>2</sub> and T<sub>3</sub> had higher LBD. On 7 August, LRIs under drought conditions, i.e., T<sub>3</sub>, T<sub>4</sub> and T<sub>5</sub> treatments, were greater than that of the control, while LEI and LBD were not affected significantly. At milking stage (R3, On 14 August), LRI under T<sub>4</sub> treatment was greater significantly, and that of T<sub>2</sub> became lower close to control level due to rewatering. At the end of grain-filling stage (measured on 29 August), T<sub>2</sub> plant leaf area was reduced significantly, whereas LRIs were not significant between the watering treatments. LEIs of T<sub>4</sub> and T<sub>5</sub> treatments were lower, indicating nearly rewatering did not trigger plant leaf erections with leaf aging.

#### 4.4. Relationships between leaf morphological and functional traits in responses to drought and rewatering.

Relationships between the morphological and functional traits of upper leaves were given in Table 4. The relationships among SPAD,  $A_{\text{sat}}$ ,  $E$ ,  $g_s$ , and WUE were significant ( $P < 0.05$ ) except the correlations of WUE with  $E$  and  $g_s$ . There were significant relationships between the two chlorophyll fluorescence parameters— $\Phi_{\text{PSII}}$  and  $F_v'/F_m'$  themselves; however, they did not correlate with SPAD values, and with gas exchange parameters ( $P > 0.05$ ). Among plant morphological traits, there were significant and positive associations of plant height with total individual plant leaf area, LBD; but negative with LEI. LEI was significantly and negatively correlated with LBD. Between plant morphological and functional traits, there were significant and negative correlations of plant height with  $A_{\text{sat}}$ ,  $g_s$ , WUE, and also those of LRI with SPAD,  $A_{\text{sat}}$ ,  $E$ ,  $g_s$  and WUE. Significant positive correlations of LEI with  $A_{\text{sat}}$  and  $g_s$  were found, whereas significant negative correlations of LBD with SPAD,  $A_{\text{sat}}$ ,  $g_s$

384 and WUE appeared, implicating the two leaf morphological indicators (i.e., LEI and  
385 LBD) may play an antagonistic role in the responses to drought episode and  
386 rewatering.

387 To elucidate the critical linkage of the important functional traits such as  
388 relationship between the chlorophyll content and photosynthetic capacity in responses  
389 to watering treatment regimens at different growth stages, the correlations between  
390 SPAD and  $A_{\text{sat}}$  were analysed. The results showed that no significant relationship was  
391 observed from jointing to tasseling stages (Figure 5a), whereas significant-positive  
392 relationships appeared from silking to blistering ( $R^2 = 0.12$ ,  $P < 0.001$ ), and from  
393 milking to denting ( $R^2 = 0.41$ ,  $P < 0.001$ ; Figure 5b,c), indicating that their correlation  
394 becomes stronger with plant developmental process, particularly at later grain-filling.  
395 In addition, no significant relationship was found under normal irrigation condition  
396 (Figure 5d), meanwhile the significant relationship appeared under drought episode or  
397 rewatering treatments (Figure 5e,f), implying that their correlation can be enhanced  
398 due to the watering treatments.

399 Based on the principal component analysis (PCA) on leaf functional and  
400 morphological traits at silking stage, the first two principal components (PCs)  
401 accounted for 60 % of the total variations of the maize traits (Figure 6). Gas exchange  
402 parameters closely positively correlated with principle component one (PC1), while  
403 the chlorophyll fluorescence parameters closely positively correlated with principle  
404 component two (PC2). There were negative correlations of PC2 with SPAD, plant  
405 height, and leaf area. The loadings were well typically distributed: the gas exchange  
406 parameters were located on the right side, the two chlorophyll fluorescence  
407 parameters upper part. SPAD was put alone on in quadrant III, while LRI was  
408 separated separately in quadrant II. Finally, the two plant growth traits were located  
409 on quadrant IV, contrasting to LRI. Plots of the two factor scores demonstrated that  
410 the drought episode treatments ( $T_4$  and  $T_5$ ) were located on right-bottom parts, which  
411 is far from the loadings of gas exchange, chlorophyll fluorescence quantum yields. It  
412 implicates that the drought episode gave a severe impact on the photosynthetic  
413 capacity, and PCA may well represent the change patterns in plant and leaf growth,

414 morphological and functional responses to the drought episode and rewatering  
415 regimes.

416

## 417 **Discussion**

418 Maize, as one of most important staple crops, playing critical role in food security and  
419 husbandry industry development (Campos *et al.* 2004; FAO 2017), is being hampered  
420 severely by adverse climate change, such as abnormal precipitation alterations and  
421 heat wave events. Drought that is been intensifying by global warming is one of major  
422 limitations to maize growth and final grain yield (Boyer 1982; Sharp *et al.* 2004;  
423 Lobell *et al.* 2014; Jiao *et al.* 2014; Avramova *et al.* 2015; Myers *et al.* 2017).  
424 Although the effect on crop from drought as a single stress factor is studied  
425 extensively, understanding the crop functional processes in responses to drought  
426 episode and rewatering is still relatively scant, particularly across an entire plant  
427 development. The present results indicated that drought during jointing period  
428 produced severe effects on vegetative growth and photosynthetic capacity, while  
429 continuous drought during tasseling greatly-negatively impacted the reproductive  
430 growth and leaf photosynthetic capacity. Rewatering could alleviate adverse effects of  
431 pre-drought, but not stimulate both vegetative and reproductive growth and  
432 photosynthetic activities to recover fully to the levels of the control. Meanwhile, the  
433 leaf chlorophyll fluorescence parameters showed a relatively-stable and adaptive  
434 changes in response to episodic drying regimes. Moreover, the leaf functional traits  
435 mostly significantly negatively correlated with morphological indicators, and leaf  
436 rolling index (LRI) could be a sensitive indicator to assess the response of plants to  
437 drought and rewatering. Moreover, the association of light-saturated net  
438 photosynthetic rate ( $A_{\text{sat}}$ ) with chlorophyll content (SPAD value) can be as an  
439 effective proxy of leaf aging and the drought episodic durations. The present results  
440 may provide a newly profound insight into understanding the crops' adaptive  
441 mechanism to drought cycle and rewatering regimes, and might be useful for the  
442 drought-resistant breeding practices and water-saving irrigation managements.

443 Nevertheless, the future models have well predicted that more extreme climate  
444 events will happen by the end of this century, making drought severer and heat waves  
445 more frequently (Luterbacher *et al.* 2004; Schär *et al.* 2004; IPCC 2014). The  
446 consequences of water availability loss have a marked influence on crop growth and



productivity (Stuhlfauth *et al.* 1990; Ciais *et al.* 2005; Chaves *et al.* 2009), finally reducing the quantity and quality of grain yield (Marco & Tricoli.1993; Serraj & Sinclair. 2002; Barnabás *et al.* 2008; Lobell *et al.* 2014), and threatening food security regionally even globally (Ghannoum 2009; Myers *et al.* 2017). Among them, photosynthesis—the fundamental process for determination of crop growth and its development, even the final grain yield, is primarily affected by crucial climatic change factors such as drought (e.g., Boyer 1982; Chaves *et al.* 1991; Jefferies *et al.* 1994; Angelopoulos *et al.* 1996; Farooq *et al.* 2009; Shen *et al.* 2015). The current results indicated that changes in the photosynthetically physiological parameters of the upper leaves are most significantly different between the different irrigation treatments ( $P < 0.05$ ). Compared with control, under drought episode, the net light-saturated photosynthetic rate ( $A_{\text{sat}}$ ), chlorophyll content (SPAD value), stomatal conductance ( $g_s$ ), and transpiration rate ( $E$ ), significantly decreased, while the actual quantum efficiency of PSII ( $\Phi_{\text{PSII}}$ ), the effective quantum yield of PSII photochemistry ( $F_v'/F_m'$ ) were no significantly declined. The previous experiments showed that the net photosynthesis rate decreases with  $g_s$  dropping (Tenhunen 1987; Jarvis & Davies 1998; Miyashita *et al.* 2005). A decrease in  $g_s$  will reduce water loss under drought stress, which also generates a drop in  $\text{CO}_2$  uptake (Frederick *et al.* 1989; Miyashita *et al.* 2005). When the plants of  $T_2$  treatment (pre-anthesis drought episode) was re-watered on 27 July, the photosynthetic parameters of leaves such as  $A_{\text{sat}}$ , SPAD,  $g_s$ ,  $E$ ,  $\Phi_{\text{PSII}}$  and  $F_v'/F_m'$  mostly harmonically increased by the rewatering following the pre-drought episode; the similar responses to rewatering also occurred under  $T_3$ ,  $T_4$  and  $T_5$  treatments (**Figures 1-3**). As reported, precipitation events could generate a rapid response of the plant biological processes, which can trigger plants growth and development (e.g., Acevedo *et al.* 1971; Reynolds *et al.* 2004), but the values of photosynthetic parameters generally were lower than control level (Xu *et al.* 2009; Xu *et al.* 2010; Suralta *et al.* 2017). The results illustrated the continuous drought constrained photosynthetic capacity of the upper leaves, and the following rewatering is unable to totally recover to normal level (**Figures 1 & 4**). As reported previously, the degree and rate of recovery of rehydration might rely on the duration and severity



477 of pre-drought (Xu & Zhou 2007; Chen *et al.* 2009; Xu *et al.* 2009, 2010; Abid *et al.*  
478 2016).

479 The change patterns of middle leaves' photosynthetic parameters were similar to  
480 those of the upper leaves (**Figures 1-3**): Under the normal treatment, SPAD,  $A_{\text{sat}}$ ,  $g_s$ ,  $E$ ,  
481 remained at a higher level compared with drought episodes ( $T_3$ ,  $T_4$ , and  $T_5$  treatments).  
482 Rewatering did not promote the photosynthetic capacities of  $T_4$ ,  $T_5$  at the grain-filling.  
483 In relation to the chlorophyll fluorescence parameters, which has been ones of the  
484 most practical and extensively used indicators to analysis plant eco-physiological  
485 processes (e.g., Maxwell & Johnson. 2000). Of them,  $F_v'/F_m'$ , as most useful one,  
486 often ranges between 0.80 and 0.83 without photoinhibition (Björkman & Demmig  
487 1987). After suffering from severe water deficit stress, however,  $F_v'/F_m'$  would  
488 decrease (Epron *et al.* 1992; Souza *et al.* 2004). However, our results showed both  
489  $F_v'/F_m'$  and  $\Phi_{\text{PSII}}$  can maintain a high level even under severe drought. The results may  
490 explain that the middle leaves' period of growth and development is longer, compared  
491 with the upper leaves. It may demonstrate a higher drought adaptability in the  
492 photochemical process and play a critical role in plant biomass accumulation and final  
493 grain yield (also see Allison & Watson 1966; Xu *et al.* 2008, 2011; Chen *et al.* 2016).  
494 For the bottom layer leaves, SPAD and  $A_{\text{sat}}$  were highest at the jointing stage (first  
495 measured on 1 July). Since then, they decreased with plant growing. The influence of  
496 drought on the bottom leaves was also consistent with the upper ones. SPAD and gas  
497 exchange parameters were also reduced markedly by the drought episode. At the end  
498 of grain-filling stage (24 August), the stimulating effect of rewatering was also lost  
499 partly. The two chlorophyll fluorescence parameters, however, remained higher under  
500 and after drought, especially at the end of grain-filling stage (e.g., withholding water  
501 from jointing to anthesis stages, total 41-day drought episode). It may again reflect the  
502 adaptive ability of maize elder leaves' photochemical activity in responses to drought  
503 episodes and thereafter rewetting.

504 The results of the tagged leaves showed that along with the growth of the same leaf,  
505 the changing trends of the photosynthetic physiological parameters under each  
506 treatment were various (**Figure 4**): under control treatment,  $A_{\text{sat}}$  remained at a low

level measured on 1 July, reaching a maximum on 25 July, thereafter linearly declining. SPAD reached a maximum on 31 July, thereafter significantly decreasing until grain-filling stage (29 August). Stomatal conductance and  $E$  decreased sharply after 31 July, whereas the changes in chlorophyll fluorescence parameters ( $\Phi_{PSII}$ ,  $F_v'/F_m'$ ) remained stable. The relative chlorophyll content and leaf gas exchange parameters of leaves in normally irrigated plants were at a high level, while those of the plants drought-stricken treatments ( $T_3$ ,  $T_4$  and  $T_5$  treatments) were at a low level, especially at the later grain-filling stage. It may highlight the leaf senescence process and its enhancement by drought stress (also see Xu *et al.* 2008; 2010). Rewatering can trigger gas exchange process; the chlorophyll fluorescence parameters ( $\Phi_{PSII}$ ,  $F_v'/F_m'$ ), however, were less affected by drought stress and rehydration (Lu & Zhang 1999; but Ghannoum *et al.* 2003; Gallé *et al.* 2007). Above all, the results again indicated that the drought-tolerance of the chlorophyll fluorescence parameters may increase with the plant/leaf growth and development when as measured in the same leaves (e.g., the tagged leaves). This issue remains debated, and needs the further research.

With the progresses of the maize plant and leaf growth, the photosynthetic performances of the upper, middle and lower leaves and the marked leaves of the maize may gradually decrease under moderate and severe drought stresses, and then recover partly after rewatering, which was consistent with previous research results (e.g., Flexas *et al.* 2009; Vaz *et al.* 2010; Xu *et al.* 2011). The current results also found that the photosynthetic performance of the middle leaves was higher than those of the both upper and lower leaves. The reasons may be due to the middle leaves being longer and greater than the upper one, and continuous drought may exacerbate further premature senescence of the bottom leaves (Iacono & Sommer 2000; Lu *et al.* 2001; He *et al.* 2002; Xu *et al.* 2011). Thus, the middle leaf has stronger photosynthetic performances than both the upper and the lower ones, and it may contribute to most of carbon accumulation as plants exposed to drought episode and the following rewetting.

The sensitivity of crop yield to water deficits often markedly differs at different plant growth stages, which has been a classic study topic (Taylor *et al.* 1983; Fereres

537 & Soriano 2007)—Generally, staple crops including maize are more sensitive to water  
 538 deficit during seedling emergence, flowering, and early grain-filling than those during  
 539 early plant growth and late grain-filling periods (e.g., Doorenbos & Kassam 1979).  
 540 Under non-lethal water deficit during early vegetative growth, marked reductions in  
 541 maize plant height and biomass were often found, and its crop phenology could delay,  
 542 but this may not closely link to a lower yield potential (Dampney & Aspinall 1976;  
 543 Abrecht & Carberry 1993). However, maize plant at jointing stage has exuberantly  
 544 metabolic activities; under drought condition, the inhibition of plant height from  
 545 jointing stage to tasseling stage was significantly greater than those at other stages  
 546 (NeSmith & Ritchie 1992; Earl & Davis 2003). Therefore, the treatment with  
 547 withholding water during the jointing period would mainly affect plant vegetative  
 548 growth, leading to vegetative growth inhibition with short plant size, small leaves and  
 549 internodes, and delays of tassel emergence, silk emergence, and onset of grain filling,  
 550 finally a grain yield loss by 15-25% (Dampney & Aspinall 1976; NeSmith & Ritchie  
 551 1992). The current results indicated that the pre-anthesis drought significantly affected  
 552 plant height and leaf size, even the canopy structure (and also see Earl & Davis 2003;  
 553 Ne Smith & Ritchie 1992). Cakir (2004) found that the water content in the early  
 554 growth stage of maize has great influence on plant height, consequently resulting in  
 555 decline in canopy absorption of photosynthetically active radiation (PAR, Earl &  
 556 Davis 2003). Thus, an early pre-anthesis water deficit might also not be neglected to  
 557 obtain high yield even high in maize field, particularly with the severe and  
 558 consecutive drought events (also see Ne Smith & Ritchie 1992). Our results  
 559 manifested that the pre-anthesis drought markedly limited vegetative growth, lead to  
 560 the declines in plant height and leaf area; and although the rehydration could alleviate  
 561 the adverse effects from drought, it could not return fully to normal level at either  
 562 early or later plant development stages. It highlights the drought constraints to maize  
 563 plant growth during not only drought-persisting but drought-relieving periods.  
 564 Additionally, leaf rolling index (LRI, Xiang *et al.* 2012), as a key parameter of plant  
 565 morphological characteristics, obviously increased during drought episodes, but  
 566 immediately decreased by rewatering. Therefore, it is suggested that the easy changes

in LRI can be as a sensitive indicator for sensing drought and rewatering during almost entire plant growing season.

As stated above, drought stress seriously affected the photosynthesis of maize, inhibited the growth and development, and eventually leading to drops in plant biomass and yield (Irigoyen *et al.* 1996; Bruce *et al.* 2002; Zhang *et al.* 2012). Maize grain yield is highly sensitive to drought during tasseling-silking period, mainly due to the marked decline in grain number (Otegui *et al.* 1995; Bolanos & Edmeades 1996; Barnabás *et al.* 2008). Our results also found that although the plants of T<sub>4</sub> and T<sub>5</sub> treatments were normally irrigated at jointing stage, the episodic drought at later tasseling stage, the ear growth was still significantly constrained relative to the control group. The current results of T<sub>4</sub> and T<sub>5</sub> treatments (pro-anthesis drought) showed no significant effect of drought at tasseling stage on the earlier plant growth. It again highlights that the later drought may exert a greatly adversely influence on the reproductive growth of maize plants.

The analysis on the correlation and principal component analysis reveal that there were positive correlations between the functional traits, except those with  $\Phi_{PSII}$  and  $F_v'/F_m'$ ; although a positive correlation themselves between  $\Phi_{PSII}$  and  $F_v'/F_m'$  was found. A significant-positive correlation between plant height and total leaf area, and a negative correlation between functional traits and morphological parameters occurred. SPAD is recognized an ideal non-destructive method for testing chlorophyll status in plant leaves, it has been widely used to investigate the environmental adaptability of crops (Manetas *et al.* 1998; Uddling *et al.* 2007; Steele *et al.* 2008; Ciganda *et al.* 2009; Pour-Aboughadareh *et al.* 2017). Interestingly, with the development of maize growth, the correlation of  $A_{sat}$  and SPAD was more positive and stronger, particularly under drought and rehydration conditions (Figure 5). Some results showed that the values of SPAD had a higher correlation with actual chlorophyll content under the conditions of lower actual chlorophyll content levels (Steele *et al.* 2008; Ciganda *et al.* 2009), depending on species and the chlorophyll distribution on leaf (Uddling *et al.* 2007). Therefore, probably maize plants grew at later growth stage and moisture condition became stressful, it may lead to reductions in both actual chlorophyll

597 content and photosynthetic performance. Thus, the relationship between  $A_{\text{sat}}$  and  
598 SPAD might become more positive and closer (**Figure 5**). It is indicated that the  
599 relationships among the functional traits of leaves would alter with plant development  
600 and environmental changes, which may become closer and stronger with senescing at  
601 the later growth stage and especially under adverse environmental conditions.

602 In conclusion, from the current field experiment, episodic drought may exert  
603 markedly negative effects on photosynthetic potentials at either pre-anthesis or  
604 post-anthesis stages, particularly during early grain-filling; and the rapid recovery of  
605 leaf photosynthetic activities following re-irrigating occurred, but the recovery  
606 magnitude and rate might depend on the severity and persistence of the previous  
607 drought, and the leaf age and plant development. Generally, the leaf gas exchange,  
608 and leaf rolling index may demonstrate higher sensitivity to drought episode and  
609 thereafter rewatering than these chlorophyll content and its fluorescence parameters.  
610 The results would provide a profound insight into how to understand the crop  
611 functional traits' responses to various drought stresses and precipitation or irrigation  
612 regimes. Finding the appropriate indicators for delayed leaf senescence while  
613 increased/stabilized photosynthetic potentials under changing water status may assist  
614 us in well dealing with climatic change to ensure crop production stability (Xu *et al.*  
615 2010; Chen *et al.* 2013; Ben-Ari *et al.* 2016). Nevertheless, unambiguous  
616 understanding the underlying mechanisms of molecular and eco-physiological  
617 responses to various drought events, and helping the staple crops to cope with future  
618 climatic change to guarantee food security regionally and globally still remain a huge  
619 challenge, and that needs to be investigated further (Lobell *et al.* 2014; Gray *et al.*  
620 2016; Myers *et al.* 2017).

621

## 622 **Acknowledgements**

623 The study was funded by the National Natural Science Foundation of China  
624 (41330531), and China Special Fund for Meteorological Research in the Public  
625 Interest (GYHY201506019). The authors are grateful to Na Mi, Fu Cai, Kunqiao Shi,  
626 Yang Yang, Quanhui Ma for their work during the experiment.

627

## 628 **Availability of data and materials**

629 The data sets supporting the results of this article are included within the article and  
630 its supporting information file.

631

## 632 **Authors' contributions**

633 ZX and GZ conceived and designed the study; HS, YL, LZ, ZX conducted the  
634 experiment and performed the data analysis; HS and ZX drafted the manuscript. All  
635 authors approved the final manuscript.

636

## 637 **Competing interests**

638 The authors declare that they have no competing interests.

639

## 640 **References**

- 641 Abendroth L, Elmore R, Hartzler RG, McGrath C, Mueller DS, Munkvold GP, Pope R, Rice ME,  
642 Robertson AE, Sawyer JE, Schaefer KJP, Tollefson JJ, Tylka GL. (2009) Corn Field Guide.  
643 Extension and Outreach Publications. Book 26. [http://lib.dr.iastate.edu/extension\\_pubs/26](http://lib.dr.iastate.edu/extension_pubs/26).  
644 Verified 21 July 2017.
- 645 Abid M, Tian Z, Ata-Ul-Karim ST, Wang F, Liu Y, Zahoor R, *et al.* (2016). Adaptation to and  
646 recovery from drought stress at vegetative stages in wheat (*Triticum aestivum*) cultivars. *Funct.*  
647 *Plant Biol.* 43, 1159-1169.
- 648 Abrecht DG, Carberry PS. (1993). The influence of water deficit prior to tassel initiation on maize  
649 growth, development and yield. *Field Crops Res.* 31, 55-69.
- 650 Acevedo E, Hsiao TC, Henderson DW. (1971). Immediate and subsequent growth responses of  
651 maize leaves to changes in water statuses. *Plant Physiol.* 48, 631–636.
- 652 Alley RB, Marotzke J, Nordhaus WD, Overpeck JT, Peteet DM, Pielke RA, *et al.* (2003). Abrupt  
653 climate change. *Science*, 299, 2005-2010.
- 654 Allison JCS, Watson DJ. (1966). The production and distribution of dry matter in maize after  
655 flowering. *Ann. Bot.* 30, 365–381.
- 656 Angelopoulos K, Dichio B, Xiloyannis C. (1996). Inhibition of photosynthesis in olive trees (*Olea*  
657 *europaea* L.) during water stress and rewatering. *J. Exp. Bot.* 47, 1093-1100.
- 658 Avramova V, AbdElgawad H, Zhang ZF, Fotschki B, Casadevall R, Vergauwen L, Knapen D,  
659 Taleisnik E, Guisez Y, Asard H, Beemster GTS. (2015). Drought induces distinct growth  
660 response, protection, and recovery mechanisms in the maize leaf growth zone. *Plant Physiol.*  
661 169, 1382-1396.

662 Barnabás B, Jäger K, Fehér A. (2008). The effect of drought and heat stress on reproductive  
663 processes in cereals. *Plant Cell Environ.* 31, 11-38.

664 Barnabás B, Jäger K, Fehér A. (2008). The effect of drought and heat stress on reproductive  
665 processes in cereals. *Plant Cell Environ.* 31, 11-38.

666 Battisti David S, Naylor Rosamond L. (2009). Seeds of doubt response. *Science* 324, 179-179.

667 Ben-Ari T, Adrian J, Klein T, Calanca P, Van der Velde M, Makowski D. (2016). Identifying  
668 indicators for extreme wheat and maize yield losses. *Agr. Forest Meteorol.* 220, 130-140.

669 Björkman O, Demmig B. (1987). Photon yield of O<sub>2</sub> evolution and chlorophyll fluorescence  
670 characteristics at 77 K among vascular plants of diverse origins. *Planta* 170, 489-504.

671 Bolanos J, Edmeades GO. 1996. The importance of the anthesis-silking interval in breeding for  
672 drought tolerance in tropical maize. *Field Crops Res.* 48:65-80.

673 Boyer JS (1982) Plant productivity and environment. *Science* 218, 443-448.

674 Bruce WB, Edmeades GO, Barker TC. (2002). Molecular and physiological approaches to maize  
675 improvement for drought tolerance. *J. Exp. Bot.* 53, 13-25.

676 Çakir R. (2004). Effect of water stress at different development stages on vegetative and  
677 reproductive growth of corn. *Field Crops Res.* 89, 1-16.

678 Campos H, Cooper A, Habben JE, Edmeades GO, Schussler JR (2004) Improving drought  
679 tolerance in maize: a view from industry. *Field Crop. Res.* 90, 19-34.

680 Chaves MM, Flexas J, Pinheiro C. (2009). Photosynthesis under drought and salt stress: regulation  
681 mechanisms from whole plant to cell. *Ann. Bot.* 103, 551-560.

682 Chaves MM, Pereira JS, Maroco J, Rodrigues ML, Ricardo CPP, Osório ML, Pinheiro C. (2002).  
683 How plants cope with water stress in the field. Photosynthesis and growth. *Ann Bot.* 89,  
684 907-916.

685 Chaves MM. (1991). Effects of water deficits on carbon assimilation. *J. Exp. Bot.* 42, 1-16.

686 Chen S, Lin G, Huang J, Jenerette GD. (2009). Dependence of carbon sequestration on the  
687 differential responses of ecosystem photosynthesis and respiration to rain pulses in a semiarid  
688 steppe. *Glob. Change Biol.* 15, 2450-2461.

689 Chen X, Chen F, Chen Y, Gao Q, Yang X, Yuan L, *et al.* (2013). Modern maize hybrids in  
690 Northeast China exhibit increased yield potential and resource use efficiency despite adverse  
691 climate change. *Glob. Change Biol.* 19, 923-936.

692 Chen Y, Wu D, Mu X, Xiao C, Chen F, Yuan L, Mi G. (2016). Vertical distribution of  
693 photosynthetic nitrogen use efficiency and its response to nitrogen in field-grown maize. *Crop*  
694 *Sci.* 56, 397-407.

695 Ciais P, Reichstein M, Viovy N, Granier A, Ogée J, Allard V, *et al.* (2005). Europe-wide reduction  
696 in primary productivity caused by the heat and drought in 2003. *Nature* 437, 529-533.

697 Ciganda V, Gitelson A, Schepers J. (2009). Non-destructive determination of maize leaf and  
698 canopy chlorophyll content. *J. Plant Physiol.* 166, 157-167.

699 Dampney HB, Aspinall D. (1976). Water deficit and inflorescence development in *Zea mays* L.  
700 *Ann. Bot.* 40, 23-35.



701 Doorenbos J, Kassam AH. (1979). Yield response to water. Irrigation and drainage paper 33:257.

702 Earl HJ, Davis RF. (2003). Effect of drought stress on leaf and whole canopy radiation use  
703 efficiency and yield of maize. *Agron. J.* 95, 688-696.

704 Epron D, Dreyer E, Breda N. (1992). Photosynthesis of oak trees [*Quercus petraea* (Matt.) Liebl.]  
705 during drought under field conditions: diurnal course of net CO<sub>2</sub> assimilation and  
706 photochemical efficiency of photosystem II. *Plant Cell Environ.* 15, 809-820.

707 FAO. (2107). FAOSTAT. <http://www.fao.org/faostat/en/#data>. Verified 21 July 2017.

708 Farooq M, Wahid A, Kobayashi N, Fujita D, Basra SMA. (2009). Plant drought stress: effects,  
709 mechanisms and management. In Sustainable agriculture (pp. 153-188). Springer Netherlands.

710 FereresE, Soriano MA. (2007). Deficit irrigation for reducing agricultural water use. *J. Exp. Bot.*  
711 58, 147-159.

712 Flexas J, Barón M, Bota J, Ducruet JM, Gallé A, Galmés J, *et al.* (2009). Photosynthesis  
713 limitations during water stress acclimation and recovery in the drought-adapted vitis hybrid  
714 Richter-110 (*V. berlandieri* × *V. rupestris*). *J. Exp. Bot.* 60, 2361-2377.

715 Flexas J, Bota J, Loreta F, Cornic G, Sharkey TD. (2004). Diffusive and metabolic limitations to  
716 photosynthesis under drought and salinity in C<sub>3</sub> plants. *Plant Biol.* 6, 1–11.

717 Francis CA, Rutger JN, Palmer AFE. (1969). A Rapid method for plant leaf area estimation in  
718 maize (*Zea mays* L.). *Crop Sci.* 9, 537-539.

719 Frederick JR, Alm DM, Hesketh JD. (1989). Leaf photosynthetic rates, stomatal resistances, and  
720 internal CO<sub>2</sub> concentrations of soybean cultivars under drought stress. *Photosynthetica* 23,  
721 575-584.

722 Gallé A, Haldimann P, Feller U. (2007). Photosynthetic performance and water relations in young  
723 pubescent oak (*Quercus pubescens*) trees during drought stress and recovery. *New Phytol.* 174,  
724 799–810.

725 Genty B, Briantais J-M, Baker NR. (1989). The relationship between the quantum yield of  
726 photosynthetic electron transport and quenching of chlorophyll fluorescence. *Biochimica et*  
727 *Biophysica Acta* 990, 87-92.

728 Ghannoum O, Conroy JP, Driscoll SP, Paul MJ, Foyer CH, Lawlor DW. (2003). Nonstomatal  
729 limitations are responsible for drought induced photosynthetic inhibition in four C<sub>4</sub> grasses.  
730 *New Phytol.* 159, 599–608.

731 Ghannoum O. (2009). C<sub>4</sub> photosynthesis and water stress. *Ann. Bot.* 103, 635-644.

732 Gray SB, Dermody O, Klein SP, Locke AM, McGrath JM, *et al.* (2016). Intensifying drought  
733 eliminates the expected benefits of elevated carbon dioxide for soybean. *Nature Plants* 2, 16132.  
734 doi:10.1038/nplants.2016.132.

735 Han GX, Zhou GS, Xu ZZ, Yang Y, Liu JL, Shi KQ. (2007). Soil temperature and biotic factors  
736 drive the seasonal variation of soil respiration in a maize (*Zea mays* L.) agricultural ecosystem.  
737 *Plant Soil* 291, 15-26.

738 Harrison MT, Tardieu F, Dong Z, Messina CD, Hammer GL. (2014). Characterizing drought stress  
739 and trait influence on maize yield under current and future conditions. *Glob. Change Biol.* 20,



740 867-878.

741 He P, Osaki M, Takebe M, Shinano T. (2002). Changes of photosynthetic characteristics in relation  
742 to leaf senescence in two maize hybrids with different senescent appearance. *Photosynthetica*  
743 40, 547–552.

744 Hsiao TC. (1973). Plant responses to water stress. *Annu. Rev. Plant Physiol.* 24, 519–570.

745 Iacono F, Sommer KJ (2000) Response of electron transport rate of water stress-affected  
746 grapevines: influence of leaf age. *VITIS* 39, 137–144.

747 IPCC. (2014). Climate Change 2014: Impacts, Adaptation, and Vulnerability. Part A: Global and  
748 Sectoral Aspects. Contribution of Working Group II to the Fifth Assessment Report of the  
749 Intergovernmental Panel on Climate Change, ed. CB Field, VR Barros, DJ Dokken, KJ Mach,  
750 MD Mastrandrea, *et al.* Cambridge University Press, Cambridge, United Kingdom and New  
751 York, NY, USA

752 Irigoyen JJ, Juan JP, Sanchez-Diaz MAN. (1996). Drought enhances chilling tolerance in a  
753 chilling-sensitive maize (*Zea mays*) variety. *New Phytol.* 134, 53-59.

754 Iversen C, Norby R. (2014). Terrestrial plant productivity and carbon allocation in a changing  
755 climate. In B. Freedman, Global Environmental Change (pp. 297-316). *Springer Netherlands*.

756 Jarvis AJ, Davies WJ. (1998). The coupled response of stomatal conductance to photosynthesis  
757 and transpiration. *J. Exp. Bot.*, 49, 399-406.

758 Jefferies RA. (1994). Drought and chlorophyll fluorescence in field-grown potato (*Solanum*  
759 *tuberosum*). *Physiol. Plant.* 90, 93-97.

760 Jolliffe IT (2002) Principal component analysis. Springer, New York.

761 Jiao HY, Zhou GS, Chen ZL. (2014). Blue paper about agricultural issues on climate change.  
762 Assessment Report on Effect of Climate Change on China' Agriculture (No.1). p1-6. Beijing:  
763 Social Science Literature Press.

764 Kramer DM, Johnson G, Kiirats O, Edwards GE. (2004). New fluorescence parameters for the  
765 determination of QA redox state and excitation energy fluxes. *Photosynth. Res.* 79, 209-218.

766 Lobell DB, Bänziger M, Magorokosho C, Vivek B. (2011). Nonlinear heat effects on African  
767 maize as evidenced by historical yield trials. *Nat. Clim. Change* 1, 42-45.

768 Lobell DB, Roberts MJ, Schlenker W, Braun N, Little BB, Rejesus RM, Hammer GL. (2014).  
769 Greater sensitivity to drought accompanies maize yield increase in the US Midwest. *Science*  
770 344, 516-519.

771 Loewenstein NJ, Pallardy SG. (2002). Influence of a drying cycle on post-drought xylem sap  
772 abscisic acid and stomatal responses in young temperate deciduous angiosperms. *New Phytol.*  
773 156, 351–361.

774 Long SP, Zhu X-G, Naidu SL, Ort DR. (2006). Can improvement in photosynthesis increase crop  
775 yields? *Plant Cell Environ.* 29, 315–330.

776 Lu C, Lu Q, Zhang J, Kuang T. (2001). Xanthophyll cycle, light energy dissipation and  
777 photosystem II down-regulation in senescent leaves of wheat plants grown in the field. *Aust J.*  
778 *Plant Physiol.* 28:1023–1030.

779 Lu C, Zhang J. (1999). Effects of water stress on photosystem II photochemistry and its  
780 thermostability in wheat plants. *J. Exp. Bot.* 50, 1199–1206.

781 Luterbacher J, Dietrich D, Xoplaki E, Grosjean M, Wanner H. (2004). European seasonal and  
782 annual temperature variability, trends, and extremes since 1500. *Science* 303, 1499-1503.

783 Manetas Y, Grammatikopoulos G, Kyparissis A. (1998). The use of the portable, non-destructive,  
784 SPAD-502 (Minolta) chlorophyll meter with leaves of varying trichome density and  
785 anthocyanin content. *J. Plant Physiol.* 153(3-4), 513-516.

786 Marco GD, Tricoli, D. (1993). Effect of water deficit on photosynthesis and electron transport in  
787 wheat grown in a natural environment. *J. Plant Physiol.* 142, 156–160.

788 Marron N, Dreyer E, Boudouresque E, Delay D, Petit J-M, Delmotte FM, Brignolas F. (2003).  
789 Impact of successive drought and re-watering cycles on growth and specific leaf area of two  
790 *Populus × canadensis* (Moench) clones, ‘Dorskamp’ and ‘Luisa Avanzo’. *Tree Physiol.* 23,  
791 1225–1235.

792 Ma X, Ma Y. (2017). The spatiotemporal variation analysis of virtual water for agriculture and  
793 livestock husbandry: A study for Jilin province in China. *Sci. Total Environ.* 586, 1150-1161.

794 Maxwell K, Johnson GN. (2000). Chlorophyll fluorescence—a practical guide. *J. Exp. Bot.* 51,  
795 659-668.

796 Meng Q, Hou P, Wu L, Chen X, Cui Z, Zhang F. (2013). Understanding production potentials and  
797 yield gaps in intensive maize production in China. *Field Crops Res.* 143, 91-97.

798 Meyer E, Aspinwall MJ, Lowry DB, Palacio-Mejía JD, Logan TL, Fay PA, Juenger TE. 2014.  
799 Integrating transcriptional metabolomic, and physiological responses to drought stress and  
800 recovery in switchgrass (*Panicum virgatum* L.). *BMC Genom.* 15, 527–542.

801 Miyashita K, Tanakamaru S, Maitani T, Kimura K. (2005). Recovery responses of photosynthesis,  
802 transpiration, and stomatal conductance in kidney bean following drought stress. *Environ. Exp.*  
803 *Bot.* 53(2), 205-214.

804 Myers SS, Smith MR, Guth S, *et al.* (2017). Climate change and global food systems: potential  
805 impacts on food security and undernutrition. *Annu. Rev. Public Health* doi:  
806 10.1146/annurev-publhealth-031816-044356. **In Press.**

807 Ne Smith DS, Ritchie JT. (1992). Short and long term responses of corn to a pre anthesis soil  
808 water deficit. *Agron. J.* 84, 107-113.

809 Otegui ME, Andrade FH, Suero EE. (1995). Growth, water use, and kernel abortion of maize  
810 subjected to drought at silking. *Field Crops Res.* 40, 87-94.

811 PINC. (2017). Crops Database. Planting Information Network of China.  
812 <http://zzys.agri.gov.cn/nongqing.aspx>, Verified, 21 July, 2017.

813 Pinheiro C, Passarinho JA, Ricardo CP. (2004). Effect of drought and rewatering on the  
814 metabolism of *Lupinus albus* organs. *J Plant Physiol* 161, 1203–1210

815 Pour-Aboughadareh A, Ahmadi J, Mehrabi AA, Etminan A, Moghaddam M, Siddique KH. (2017).  
816 Physiological responses to drought stress in wild relatives of wheat: implications for wheat  
817 improvement. *Acta Physiol. Plant.* 39, 106. doi:10.1007/s11738-017-2403-z. **In Press.**

Reynolds JF, Kemp PR, Ogle K, Fernández RJ. (2004). Modifying the ‘pulse–reserve’ paradigm for deserts of north America: precipitation pulses, soil water, and plant responses. *Oecologia* 141, 194-210.

Ribaut J-M, Betran J, Monneveux P, Setter T. (2009). Drought tolerance in maize. In: Bennetzen JL & Hake SC. (eds.), *Handbook of Maize: Its Biology*. p311-344. Springer Science + Business Media.

Rurinda J, Mapfumo P, van Wijk MT, Mtambanengwe F, Rufino MC, Chikowo R, Giller KE. (2014). Comparative assessment of maize, finger millet and sorghum for household food security in the face of increasing climatic risk. *Eur. J. Agron.* 55, 29-41.

Saini HS, Westgate ME. (1999). Reproductive development in grain crops during drought. *Adv. Agron.* 68, 59-96.

Schär C, Vidale PL, Lüthi D, Frei C, Häberli C, Liniger MA, *et al.* (2004). The role of increasing temperature variability in european summer heatwaves. *Nature* 427(6972), 332-6.

Serraj R, Sinclair TR. (2002). Osmolyte accumulation: can it really help increase crop yield under drought conditions? *Plant Cell Environ.* 25, 333-341.

Sharp RE, Poroyko V, Hejlek LG, Spollen WG, Springer GK, Bohnert HJ, Nguyen HT (2004) Root growth maintenance during water deficits: physiology to functional genomes. *J. Exp. Bot.* 55, 2343-2351.

Shen X, Dong Z, Chen Y. (2015). Drought and UV-B radiation effect on photosynthesis and antioxidant parameters in soybean and maize. *Acta Physiol. Plant.* 37, 1-8.

Souza RP, Machado EC, Silva JAB, Lagôa AMMA, Silveira JAG. (2004). Photosynthetic gas exchange, chlorophyll fluorescence and some associated metabolic changes in cowpea (*Vigna unguiculata*) during water stress and recovery. *Environ. Exp. Bot.* 51, 45-56.

Steele MR, Gitelson AA, Rundquist DC. (2008). A comparison of two techniques for nondestructive measurement of chlorophyll content in grapevine leaves. *Agron. J.* 100, 779-782.

Stuhlfauth T, Scheuermann R, Fock HP. (1990). Light energy dissipation under water stress conditions contribution of reassimilation and evidence for additional processes. *Plant Physiol.* 92, 1053-61.

Sun C, Gao X, Chen X, Fu J, Zhang Y. (2016). Metabolic and growth responses of maize to successive drought and re-watering cycles. *Agr. Water Manag.* 172, 62-73.

Suralta RR, Kano-Nakata M, Niones JM, Inukai Y, Kameoka E, Tran TT, *et al.* (2017). Root plasticity for maintenance of productivity under abiotic stressed soil environments in rice: Progress and prospects. *Field Crops Res.* doi:10.1016/j.fcr.2016.06.023. **In Press.**

Taylor HM, Jordan WR, Sinclair TR. (1983). Limitations to efficient water use in production. Madison, WIASA, CSSA, SSSA.

Tenhunen JD, Pearcy RW, Lange and OL. (1987). Diurnal variations in leaf conductance and gas exchange in natural environments. In: Zeiger, Farquhar GD & Cowan IR (eds), *Stomatal Function*, p323. Stanford University Press, Stanford, California.

857 Trenberth KE, Dai A, Van Der Schrier G, Jones PD, Barichivich J, Briffa KR, Sheffield J. (2014).  
858 Global warming and changes in drought. *Nat. Clim. Change* 4, 17-22.

859 Uddling J, Gelang-Alfredsson J, Piikki K, Pleijel H. (2007). Evaluating the relationship between  
860 leaf chlorophyll concentration and SPAD-502 chlorophyll meter readings. *Photosynth. Res.* 91,  
861 37-46.

862 van Kooten O, Snel JFH. (1990). The use of chlorophyll fluorescence nomenclature in plant stress  
863 physiology. *Photosynth. Res.* 25, 147-150.

864 Vaz M, Pereira JS, Gazarini LC, David TS, David JS, Rodrigues A, *et al.* (2010). Drought-induced  
865 photosynthetic inhibition and autumn recovery in two Mediterranean oak species (*Quercus ilex*  
866 and *Quercus suber*). *Tree Physiol.* 30, 946-956.

867 Xiang JJ, Zhang GH, Qian Q, Xue HW. (2012). Semi-rolled leaf1 encodes a putative  
868 glycosylphosphatidylinositol-anchored protein and modulates rice leaf rolling by regulating the  
869 formation of bulliform cells. *Plant Physiol.* 159, 1488-1500.

870 Xu ZZ, Zhou GS. (2007). Photosynthetic recovery of a perennial grass *Leymus chinensis* after  
871 different periods of soil drought. *Plant Prod. Sci.* 10, 277-285.

872 Xu ZZ, Zhou GS, Han GX, Li YJ. (2011). Photosynthetic potential and its association with lipid  
873 peroxidation in response to high temperature at different leaf ages in maize. *J. Plant Growth*  
874 *Regul.* 30, 41-50.

875 Xu ZZ, Zhou GS, Shimizu H. (2010). Plant responses to drought and rewatering. *Plant Signal.*  
876 *Behav.* 5, 649-654.

877 Xu ZZ, Zhou GS, Shimizu H. (2009). Are plant growth and photosynthesis limited by pre-drought  
878 following rewatering in grass? *J. Exp. Bot.* 60, 3737-3749.

879 Xu ZZ, Zhou GS, Wang YL, Han GX, Li YJ. (2008). Changes in chlorophyll fluorescence in  
880 maize plants with imposed rapid dehydration at different leaf ages. *J. Plant Growth Regul.* 27,  
881 83-92.

882 Xu ZZ, Zhou GS. (2007). Photosynthetic recovery of a perennial grass after different periods of  
883 soil drought. *Plant Production Sci.* 10, 277-285.

884 Yahdjian L, Sala OE. (2006). Vegetation structure constrains primary production response to water  
885 availability in the Patagonian steppe. *Ecology* 87, 952-962.

886 Yordanov I, Velikova V, Tsonev T. (2000). Plant responses to drought, acclimation, and stress  
887 tolerance. *Photosynthetica* 38, 171-186.

888 Zhang L, Gao M, Hu J, Zhang X, Wang K, Ashraf M. (2012). Modulation role of abscisic acid  
889 (ABA) on growth, water relations and glycinebetaine metabolism in two maize (*Zea mays* L.)  
890 cultivars under drought stress. *Int. J. Mol. Sci.* 13, 3189-3202.

891 Zhang RH, Xue JQ, Pu J, Zhao B, Zhang XH, Zheng YJ, Bu LD. (2011). Effects of drought stress  
892 on plant growth and photosynthetic characteristic of maize seedlings. *Acta Agron. Sin.* 37,  
893 521-528.

894 Zheng H, Zhang X, Ma W, Song J, Rahman SU, Wang J, Zhang Y. (2017). Morphological and  
895 physiological responses to cyclic drought in two contrasting genotypes of *Catalpa bungei*.

896      *Environ. Exp. Bot.* 138, 77–87.  
897      Zhou GS. (2014). Research perspectives on effect of climate change on China' Agricultural  
898      production. *Meteorol. Environ. Sci.* 38, 80-94.  
899  
900

901

902 **Table 1** Simulated rainfall regimes in the field experiment under a rain-shelter.

| Growth stage  | Irrigation dates(Month/day) | T <sub>1</sub>            | T <sub>2</sub>            | T <sub>3</sub>            | T <sub>4</sub>            | T <sub>5</sub>            |
|---------------|-----------------------------|---------------------------|---------------------------|---------------------------|---------------------------|---------------------------|
|               |                             | Irrigating at every 7-day | Drought episode (27 days) | Drought episode (41 days) | Drought episode (41 days) | Drought episode (34 days) |
|               |                             | Irrigation amount (mm)    |                           |                           |                           |                           |
| V3~V13        | 5/24                        | 8.7                       | 8.7                       | 8.7                       | 8.7                       | 8.7                       |
|               | 5/30                        | 0.8                       | 0.8                       | 0.8                       | 0.8                       | 0.8                       |
|               | 6/8                         | 10                        | 10                        | 10                        | 10                        | 10                        |
|               | 6/15                        | 10                        | 10                        | 10                        | 10                        | 10                        |
|               | 6/22                        | 10                        | 10                        | 10                        | 10                        | 10                        |
|               | 6/29                        | 24                        | 24                        | 24                        | 24                        | 24                        |
| V13~VT        | 7/6                         | 24                        | 0                         | 0                         | 24                        | 24                        |
|               | 7/13                        | 24                        | 0                         | 0                         | 24                        | 24                        |
|               | 7/20                        | 25                        | 0                         | 0                         |                           | 25                        |
| VT~R4         | 7/27                        | 25                        | 25                        | 0                         | 0                         | 0                         |
|               | 8/3                         | 25                        | 25                        | 0                         | 0                         | 0                         |
|               | 8/10                        | 25                        | 25                        | 25                        | 0                         | 0                         |
|               | 8/17                        | 25                        | 25                        | 25                        | 0                         | 0                         |
|               | 8/24                        | 24                        | 24                        | 24                        | 24                        | 24                        |
| Entire period | Total precipitation         | 260.5                     | 187.5                     | 137.5                     | 135.5                     | 160.5                     |

903 Notes: The dates measuring photosynthetic parameters are 1, July (V13, jointing); 14, July (V21);  
 904 25, July (VT, tasseling); 31, July (R1, Silking); 7, August (R2, blistering); 14, August (R3,  
 905 milking); 29, August (R4, dough), respectively. Red parts indicate the drought episodes. Relative  
 906 Soil water moisture (0 – 50 cm depth) decreased to a severe water deficit stress level of 30-40% at  
 907 the ends of the drought episodes, meanwhile it maintained a normal level of 70-80% in the control  
 908 plots or after rewatering. The maize growth stage nomenclature refers to Abendroth *et al.* (2009),  
 909 [http://lib.dr.iastate.edu/extension\\_pubs/26](http://lib.dr.iastate.edu/extension_pubs/26). Verified 21 July 2017.

910

**Table 2** A significance list based on ANOVA for the effects and their interactions on the traits from watering, leaf position, and date

|        | SPAD    | $A_{\text{sat}}$ | $E$     | $g_s$   | WUE     | $q_P$   | NPQ     | $\Phi_{\text{PSII}}$ | $F_v'/F_m'$ |
|--------|---------|------------------|---------|---------|---------|---------|---------|----------------------|-------------|
| W      | <0.001  | <0.001           | <0.001  | 0.988   | 0.007   | 0.114   | <0.001  | 0.215                | 0.946       |
| LP     | <0.001  | <0.001           | <0.001  | 0.589   | <0.001  | <0.001  | 0.018   | 0.005                | 0.063       |
| Date   | <0.001  | <0.001           | <0.001  | 0.009   | <0.001  | <0.001  | <0.001  | <0.001               | <0.001      |
| W×LP   | 0.768   | 0.578            | 0.469   | 0.515   | 0.271   | 0.825   | 0.194   | 0.633                | 0.399       |
| W×D    | <0.001  | 0.006            | <0.001  | 0.324   | <0.001  | 0.692   | <0.001  | 0.307                | 0.512       |
| LP×D   | <0.001  | 0.002            | <0.001  | 0.014   | 0.454   | <0.001  | 0.178   | <0.001               | <0.001      |
| W×LP×D | 0.156ns | 0.963ns          | 0.939ns | 0.946ns | 0.452ns | 0.692ns | 0.990ns | 0.850ns              | 0.635ns     |

Note:  $P$  values are given. ns, no significant difference; W, LP, and D denote watering treatment, leaf position, and measurement data, respectively. ×, interaction sign; SPAD, relative chlorophyll content;  $A_{\text{sat}}$ , light-saturated photosynthetic rate;  $E$ , transpiration rate;  $g_s$ , stomatal conductance; WUE, water use efficiency;  $\Phi_{\text{PSII}}$ , PSII actual quantum yield;  $F_v'/F_m'$ , maximum quantum yield;  $q_P$ , photochemical quenching; NPQ, non-photochemical quenching.

**Table 3** Effects of drought and rewatering on the plant growth and morphological indicators of maize (2016).

| Traits                                                | Treatments     | 1 Jul         | 14 Jul               | 25 Jul               | 31 Jul                | 7 Aug                 | 14 Aug                | 29 Aug               |
|-------------------------------------------------------|----------------|---------------|----------------------|----------------------|-----------------------|-----------------------|-----------------------|----------------------|
| Plant height (m)                                      | T <sub>1</sub> | 1.434±0.066a  | 2.014±0.097a         | <b>2.667±0.084a</b>  | 2.717±0.119a          | <b>2.734±0.134a</b>   | 2.729±0.144a          | 2.717±0.134a         |
|                                                       | T <sub>2</sub> | 1.336±0.057a  | 1.897±0.051a         | <b>2.233±0.093b</b>  | 2.240±0.084a          | <b>2.232±0.092b</b>   | 2.428±0.224a          | 2.214±0.108a         |
|                                                       | T <sub>3</sub> | 1.476±0.07a   | 1.897±0.051a         | <b>2.233±0.093b</b>  | 2.327±0.132a          | <b>2.436±0.148ab</b>  | 2.407±0.157a          | 2.333±0.199a         |
|                                                       | T <sub>4</sub> | 1.477±0.043a  | 2.014±0.097a         | <b>2.670±0.045a</b>  | 2.710±0.147a          | <b>2.745±0.104a</b>   | 2.751±0.110a          | 2.730±0.099a         |
|                                                       | T <sub>5</sub> | 1.355±0.009a  | 2.014±0.097a         | <b>2.667±0.084a</b>  | 2.463±0.224a          | <b>2.556±0.212ab</b>  | 2.527±0.230a          | 2.520±0.272a         |
| Total leaf area (m <sup>2</sup> plant <sup>-1</sup> ) | T <sub>1</sub> | 0.389±0.025a  | 0.823±0.035a         | <b>0.998±0.018a</b>  | 1.049±0.021a          | 1.037±0.044a          | <b>0.974±0.017a</b>   | <b>0.848±0.009a</b>  |
|                                                       | T <sub>2</sub> | 0.400±0.039a  | 0.769±0.064a         | <b>0.871±0.034b</b>  | 0.890±0.065a          | 0.930±0.047a          | <b>0.809±0.038b</b>   | <b>0.643±0.08b</b>   |
|                                                       | T <sub>3</sub> | 0.437±0.01a   | 0.769±0.064a         | <b>0.871±0.034b</b>  | 0.953±0.097a          | 0.871±0.054a          | <b>0.686±0.042b</b>   | <b>0.692±0.082ab</b> |
|                                                       | T <sub>4</sub> | 0.423±0.038a  | 0.823±0.035a         | <b>0.988±0.023a</b>  | 1.025±0.002a          | 0.974±0.016a          | <b>0.768±0.058b</b>   | <b>0.781±0.012ab</b> |
|                                                       | T <sub>5</sub> | 0.363±0.006a  | 0.823±0.035a         | <b>0.998±0.018a</b>  | 0.877±0.078a          | 0.879±0.067a          | <b>0.837±0.07ab</b>   | <b>0.738±0.043ab</b> |
| Leaf rolling index (LRI, %)                           | T <sub>1</sub> | 9.801±0.814a  | <b>13.031±1.87b</b>  | <b>7.993±2.824b</b>  | <b>5.381±0.285c</b>   | <b>9.712±1.127d</b>   | <b>9.795±1.410c</b>   | 12.907±0.682a        |
|                                                       | T <sub>2</sub> | 10.143±0.795a | <b>19.274±0.614a</b> | <b>17.626±1.356a</b> | <b>11.702±2.561b</b>  | <b>12.126±2.358cd</b> | <b>10.453±0.910c</b>  | 18.344±4.505a        |
|                                                       | T <sub>3</sub> | 11.116±0.288a | <b>19.274±0.614a</b> | <b>17.626±1.356a</b> | <b>23.194±1.653a</b>  | <b>26.575±0.513a</b>  | <b>17.24±1.212ab</b>  | 18.692±1.192a        |
|                                                       | T <sub>4</sub> | 9.691±1.278a  | <b>13.031±1.87b</b>  | <b>9.594±1.546b</b>  | <b>10.163±0.466b</b>  | <b>16.867±0.658b</b>  | <b>21.926±2.889a</b>  | 18.93±3.082a         |
|                                                       | T <sub>5</sub> | 11.322±1.539a | <b>13.031±1.87b</b>  | <b>7.993±2.824b</b>  | <b>7.336±0.257bc</b>  | <b>15.059±0.874bc</b> | <b>14.641±0.925bc</b> | 12.608±2.55a         |
| Leaf erection index (LEI, %)                          | T <sub>1</sub> | 71.734±2.621a | 81.218±5.921a        | 87.103±2.10a         | 71.813±7.855a         | 70.960±2.811a         | 59.500±4.481a         | <b>79.330±7.217a</b> |
|                                                       | T <sub>2</sub> | 73.885±0.901a | 81.710±6.650a        | 92.412±1.10a         | 59.130±6.364a         | 65.779±1.005a         | 54.834±5.317a         | <b>65.922±1.196a</b> |
|                                                       | T <sub>3</sub> | 70.300±1.434a | 81.710±6.650a        | 92.412±1.10a         | 56.537±3.256a         | 61.011±4.763a         | 50.771±5.036a         | <b>68.788±3.498a</b> |
|                                                       | T <sub>4</sub> | 73.822±2.055a | 81.218±5.921a        | 79.918±10.07a        | 65.282±7.415a         | 64.864±5.571a         | 50.230±1.623a         | <b>52.139±3.120b</b> |
|                                                       | T <sub>5</sub> | 71.160±6.133a | 81.218±5.921a        | 87.103±2.10a         | 59.149±8.36a          | 56.684±7.818a         | 46.903±3.308a         | <b>49.341±4.209b</b> |
| Leaf bend degree (LBD, °)                             | T <sub>1</sub> | 37.417±1.856a | 16.750±4.116a        | 9.333±1.764a         | <b>36.222±4.283c</b>  | 53.567±6.19a          | 81.417±9.419a         | 59.983±20.037a       |
|                                                       | T <sub>2</sub> | 33.000±1.953a | 16.000±6.948a        | 11.783±3.537a        | <b>50.694±5.022ab</b> | 41.833±2.485a         | 69.167±5.988a         | 44.233±13.638a       |
|                                                       | T <sub>3</sub> | 39.667±5.516a | 16.000±6.948a        | 11.783±3.537a        | <b>55.833±4.757a</b>  | 37.083±7.045a         | 71.117±7.148a         | 49.583±18.112a       |
|                                                       | T <sub>4</sub> | 33.917±1.609a | 16.750±4.116a        | 13.833±2.167a        | <b>31.722±3.692c</b>  | 45.167±6.749a         | 65.278±8.084a         | 83.694±11.916a       |
|                                                       | T <sub>5</sub> | 35.750±3.527a | 16.750±4.116a        | 9.333±1.764a         | <b>37.944±1.811bc</b> | 50.733±2.709a         | 60.833±6.194a         | 55.361±4.835a        |

Note: T<sub>1</sub>, T<sub>2</sub>, T<sub>3</sub>, T<sub>4</sub>, and T<sub>5</sub> denote Control, withholding water during jointing-tasseling, jointing-anthesis, tasseling-milking, and silking-milking, with 260, 188, 138, 136, and 161 mm irrigation amount in entire development, respectively. Different little-letters with mean data indicate significant differences between the five watering treatments (bold parts, n = 3-5).



**Table 4** Correlation coefficients between the functional and morphological traits of upper leaves

|                      | SPAD            | $A_{\text{sat}}$ | $E$             | $g_s$           | WUE             | $\Phi_{\text{PSII}}$ | $F_v'/F_m'$ | Plant height   | Plant leaf area | LRI    | LEI             |
|----------------------|-----------------|------------------|-----------------|-----------------|-----------------|----------------------|-------------|----------------|-----------------|--------|-----------------|
| $A_{\text{sat}}$     | <b>0.546**</b>  |                  |                 |                 |                 |                      |             |                |                 |        |                 |
| $E$                  | <b>0.498**</b>  | <b>0.813**</b>   |                 |                 |                 |                      |             |                |                 |        |                 |
| $g_s$                | <b>0.427**</b>  | <b>0.845**</b>   | <b>0.816**</b>  |                 |                 |                      |             |                |                 |        |                 |
| WUE                  | <b>0.304*</b>   | <b>0.479**</b>   | 0.042           | 0.186           |                 |                      |             |                |                 |        |                 |
| $\Phi_{\text{PSII}}$ | -0.152          | -0.184           | -0.039          | -0.143          | -0.206          |                      |             |                |                 |        |                 |
| $F_v'/F_m'$          | -0.111          | -0.045           | 0.045           | -0.049          | -0.119          | <b>0.911**</b>       |             |                |                 |        |                 |
| Pant height          | -0.232          | <b>-0.391**</b>  | -0.168          | <b>-0.316**</b> | <b>-0.344**</b> | -0.036               | -0.02       |                |                 |        |                 |
| Plant leaf area      | -0.021          | -0.211           | -0.035          | -0.222          | -0.238          | -0.015               | 0.021       | <b>0.854**</b> |                 |        |                 |
| LRI                  | <b>-0.436**</b> | <b>-0.506**</b>  | <b>-0.449**</b> | <b>-0.422**</b> | -0.204          | 0.014                | -0.039      | 0.18           | 0.094           |        |                 |
| LEI                  | 0.145           | <b>0.328**</b>   | 0.217           | 0.264*          | 0.227           | -0.166               | -0.025      | -0.298*        | -0.185          | -0.211 |                 |
| LBD                  | <b>-0.264**</b> | <b>-0.383**</b>  | -0.232          | <b>-0.310*</b>  | <b>-0.279*</b>  | 0.119                | 0.007       | <b>0.389**</b> | 0.139           | 0.151  | <b>-0.460**</b> |

\* $P < 0.05$ , \*\* $P < 0.01$  represent significant differences. LRI, leaf rolling index; LEI, leaf erection index; LBD, leaf bend degree. Others see table 2.

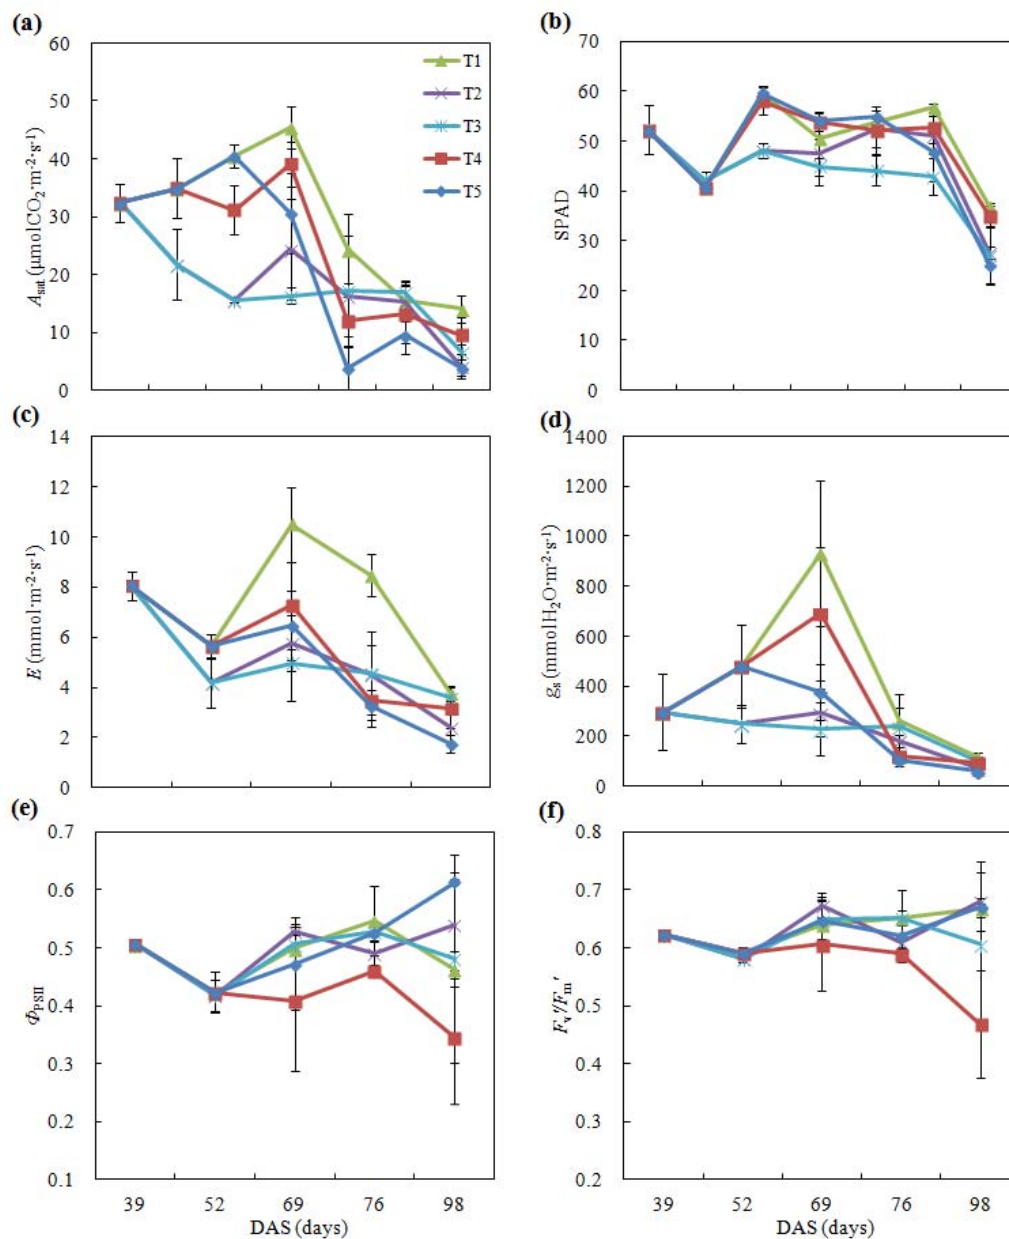

**Figure 1.** Effects of drought episode and rewetting on photosynthetic physiological processes in upper leaves.

Notes: DAS, days after sowing;  $A_{\text{sat}}$ , light-saturated photosynthetic rate; SPAD, relative chlorophyll contents;  $g_s$ , stomatal conductance;  $E$ , transpiration rate;  $\Phi_{\text{PSII}}$ , PSII actual quantum yield;  $F_v/F_m'$ , maximum quantum yield. T1, T2, T3, T4, and T5 denote Control, withholding water during jointing-tasseling, jointing-anthesis, tasseling-milking, and silking-milking, with 260, 188, 138, 136, and 161 mm irrigation amount in entire plant development, respectively.

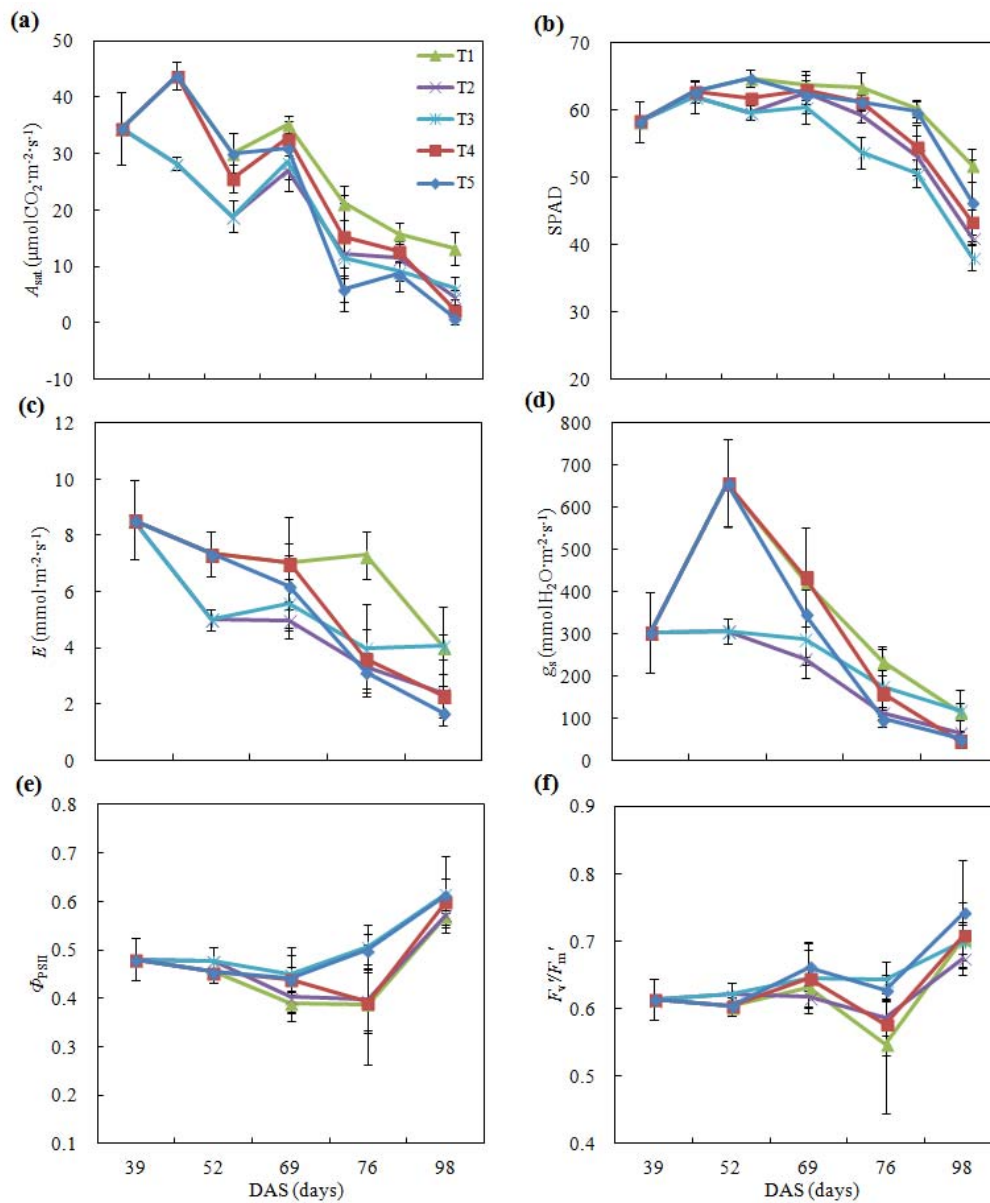

**Figure 2.** Effects of drought episode and rewatering on photosynthetic physiological processes in middle leaves.

Notes: DAS, days after sowing;  $A_{\text{sat}}$ , light-saturated photosynthetic rate; SPAD, relative chlorophyll contents;  $g_s$ , stomatal conductance;  $E$ , transpiration rate;  $\Phi_{\text{PSII}}$ , PSII actual quantum yield;  $F_v/F_m'$ , maximum quantum yield. T1, T2, T3, T4, and T5 denote Control, withholding water during jointing-tasseling, jointing-anthesis, tasseling-milking, and silking-milking, with 260, 188, 138, 136, and 161 mm irrigation amount in entire plant development, respectively

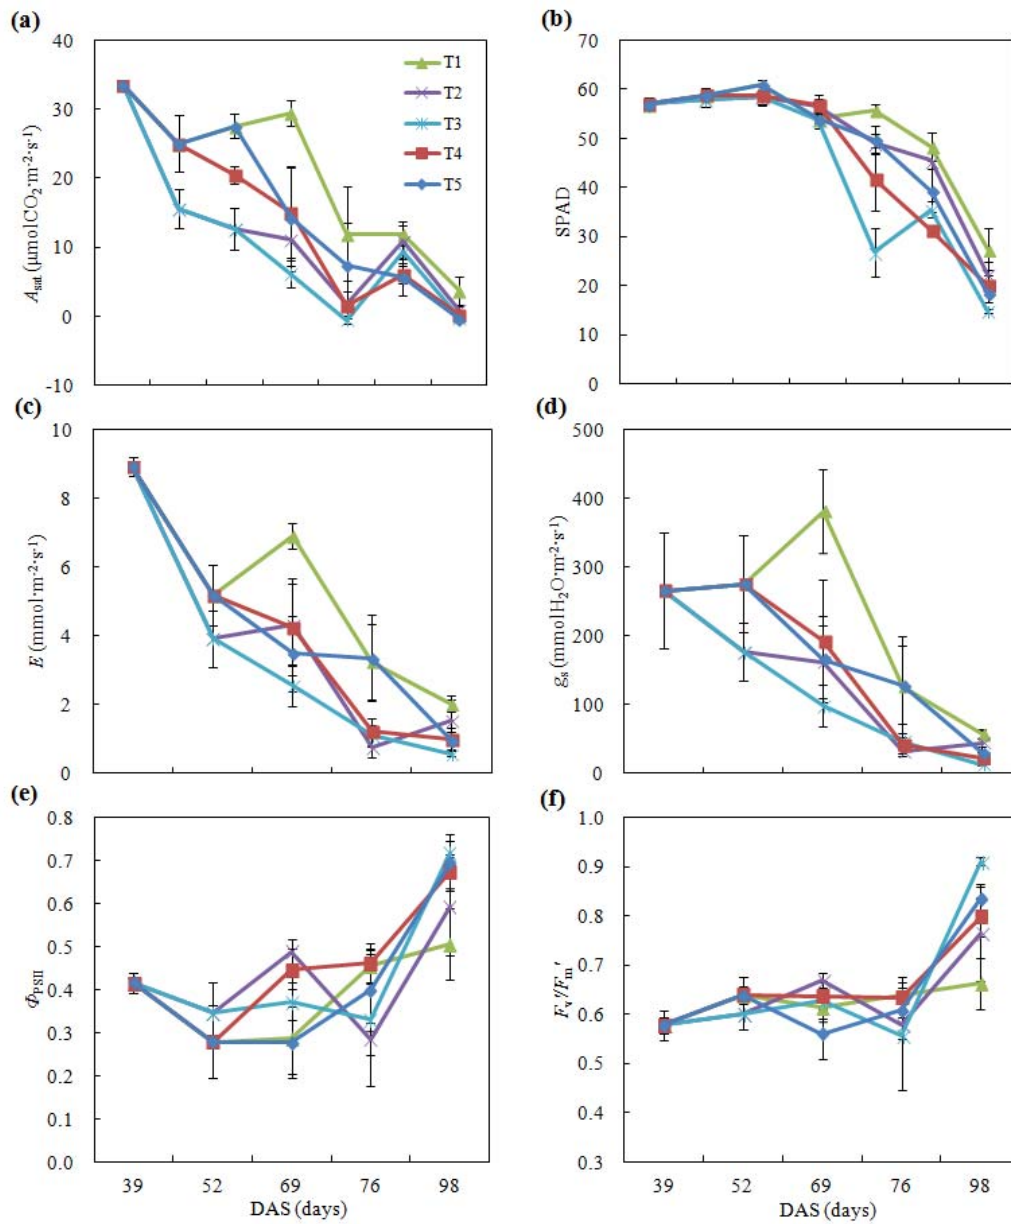

**Figure 3.** Effects of drought episode and rewatering on photosynthetic physiological processes in bottom leaves.

Notes: DAS, days after sowing;  $A_{\text{sat}}$ , light-saturated photosynthetic rate; SPAD, relative chlorophyll contents;  $g_s$ , stomatal conductance;  $E$ , transpiration rate;  $\Phi_{\text{PSII}}$ , PSII actual quantum yield;  $F_v/F_m'$ , maximum quantum yield. T1, T2, T3, T4, and T5 denote Control, withholding water during jointing-tasseling, jointing-anthesis, tasseling-milking, and silking-milking, with 260, 188, 138, 136, and 161 mm irrigation amount in entire plant development, respectively.

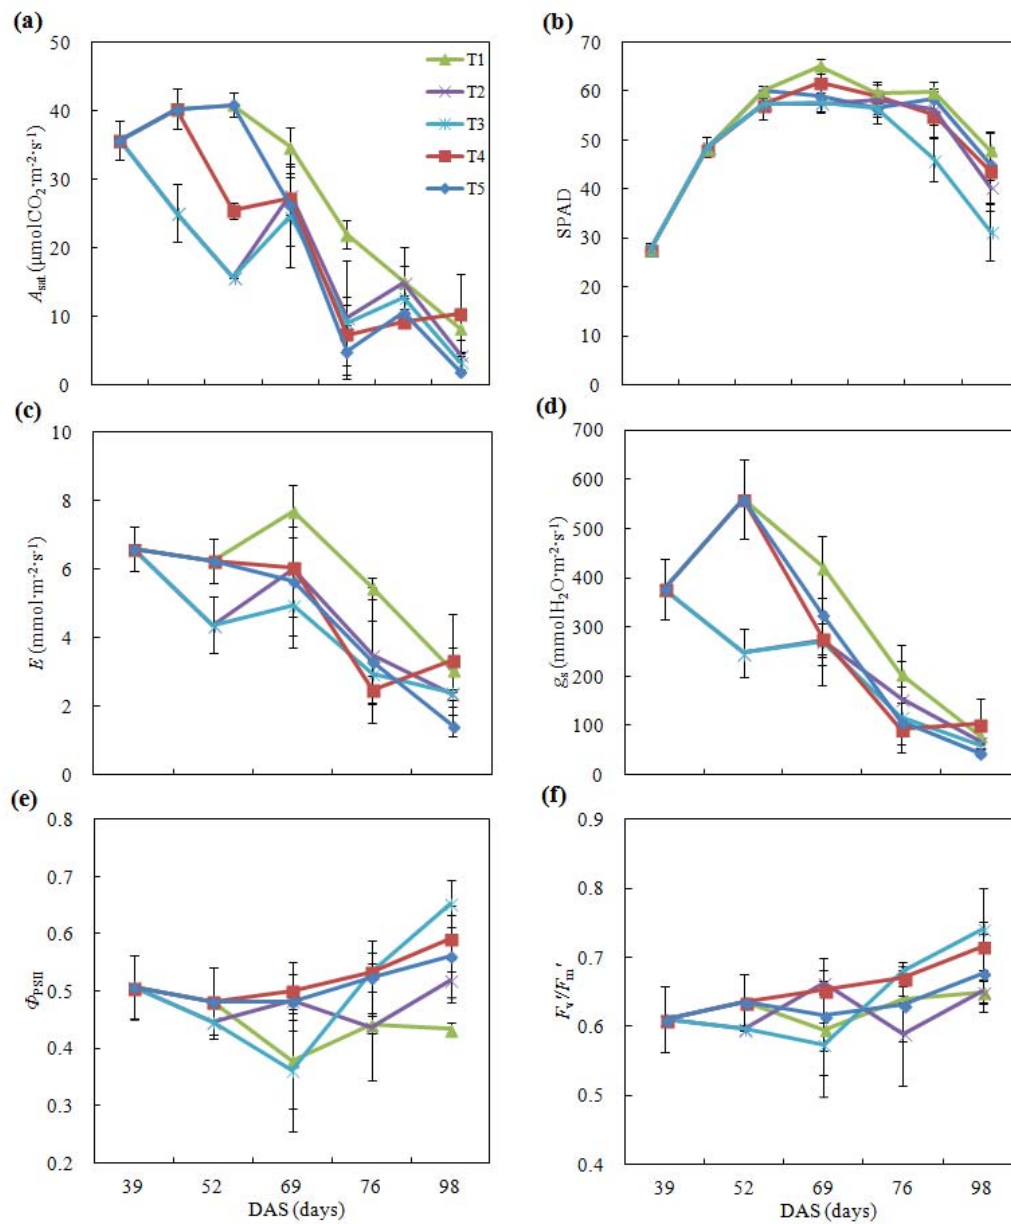

**Figure 4.** Photosynthetic physiological changes and the responses to drought episode and rewetting in the tagged leaves.

Notes: DAS, days after sowing;  $A_{\text{sat}}$ , light-saturated photosynthetic rate; SPAD, relative chlorophyll contents;  $g_s$ , stomatal conductance;  $E$ , transpiration rate;  $\Phi_{\text{PSII}}$ , PSII actual quantum yield;  $F_v/F_m'$ , maximum quantum yield. T<sub>1</sub>, T<sub>2</sub>, T<sub>3</sub>, T<sub>4</sub>, and T<sub>5</sub> denote Control, withholding water during jointing-tasseling, jointing-anthesis, tasseling-milking, and silking-milking, with 260, 188, 138, 136, and 161 mm irrigation amount in entire plant development, respectively.

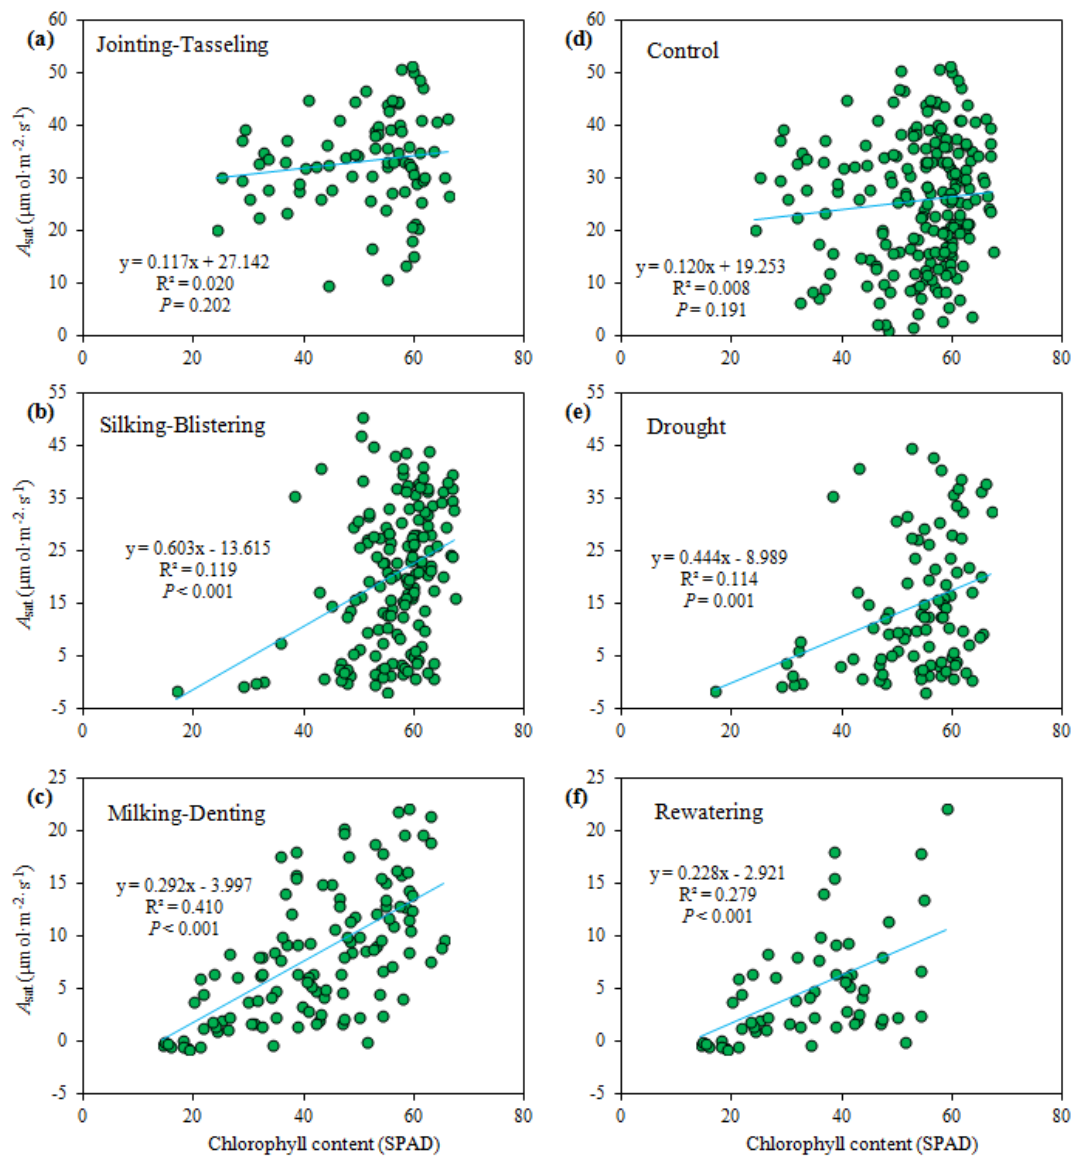

**Figure 5** Effects of drought, rewatering, and plant developmental stages on relationships between light-saturated photosynthetic rate ( $A_{sat}$ ) and relative chlorophyll content (SPAD readings).

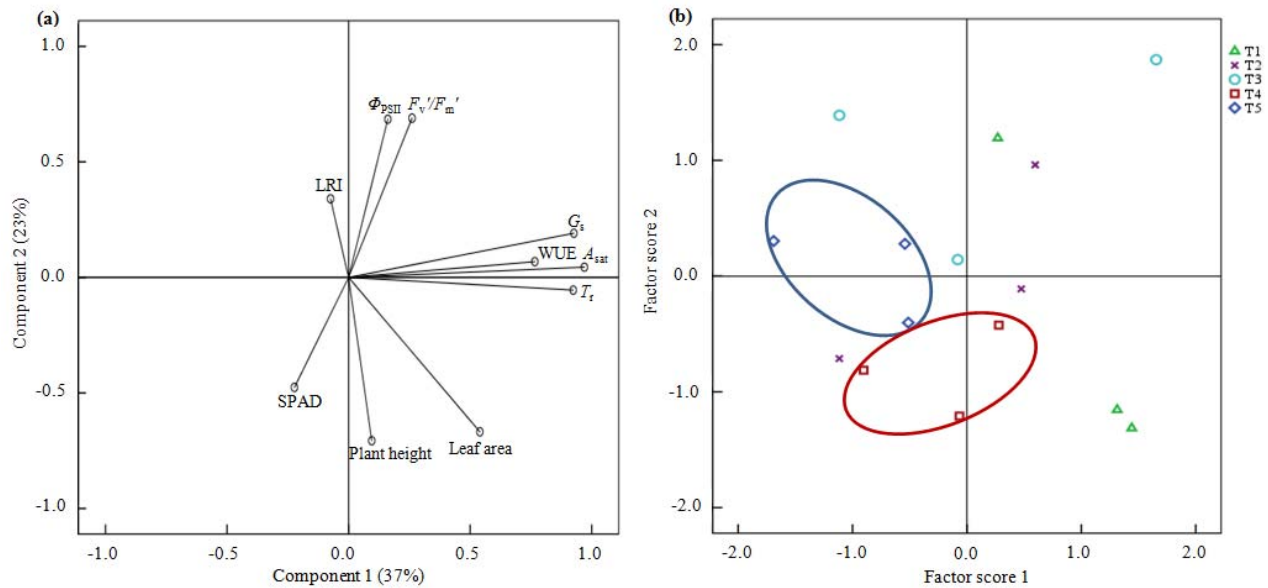

**Figure 6** Principal component analysis on leaf functional and morphological traits and the effects of watering treatments at silking stage.

Notes: LRI, leaf-rolling index; WUE, water use efficiency; red ellipse is for T<sub>4</sub> treatment, while blue one is for T<sub>5</sub> treatment. For others see Fig. 1 and table 3.
